1     **The genome of the zoonotic malaria parasite *Plasmodium simium* reveals**  
2                                     **adaptions to host-switching**

3

4 Tobias Mourier<sup>1</sup>, Denise Anete Madureira de Alvarenga<sup>2</sup>, Abhinav Kaushik<sup>1</sup>, Anielle de Pina-  
5 Costa<sup>3,4,5§</sup>, Francisco J. Guzmán-Vega<sup>6§</sup>, Olga Douvropoulou<sup>1§</sup>, Qingtian Guan<sup>1§</sup>, Sarah  
6 Forrester<sup>7</sup>, Filipe Vieira Santos de Abreu<sup>3,8</sup>, Cesare Bianco Júnior<sup>3,9</sup>, Julio Cesar de Souza  
7 Junior<sup>10</sup>, Zelinda Maria Braga Hirano<sup>10</sup>, Alcides Pissinatti<sup>11</sup>, Silvia Bahadian Moreira<sup>11</sup>, Maria  
8 de Fátima Ferreira-da-Cruz<sup>3,9</sup>, Ricardo Lourenço de Oliveira<sup>3,8</sup>, Stefan T. Arold<sup>6,12</sup>, Daniel C.  
9 Jeffares<sup>7</sup>, Patrícia Brasil<sup>3,4</sup>, Cristiana Ferreira Alves de Brito<sup>2</sup>, Richard Culleton<sup>13</sup>, Cláudio  
10 Tadeu Daniel-Ribeiro<sup>3,9†</sup> & Arnab Pain<sup>1,14,15†</sup>

11

12 1) Pathogen Genomics Laboratory, Biological and Environmental Sciences and Engineering  
13 (BESE) Division, King Abdullah University of Science and Technology (KAUST), Thuwal,  
14 Saudi Arabia

15 2) Grupo de Pesquisa em Biologia Molecular e Imunologia da Malária, Fundação Oswaldo  
16 Cruz (Fiocruz), Belo Horizonte/MG, 30190-009, Brazil

17 3) Centro de Pesquisa, Diagnóstico e Treinamento em Malária (CPD-Mal), Fiocruz, Rio de  
18 Janeiro/RJ, 21040-360, Brazil

19 4) Laboratório de Pesquisa Clínica em Doenças Febris Agudas, Instituto Nacional de  
20 Infectologia Evandro Chagas, Fiocruz, Rio de Janeiro/RJ, 21040-360, Brazil

21 5) Centro Universitário Serra dos Órgãos (UNIFESO), Teresópolis/RJ, 25964-004, Brazil

22 6) Computational Bioscience Research Center, Biological and Environmental Sciences and  
23 Engineering (BESE) Division, King Abdullah University of Science and Technology  
24 (KAUST), Thuwal, Saudi Arabia

25 7) Department of Biology and York Biomedical Research Institute, University of York,  
26 Wentworth Way, York, YO10 5DD, U.K.

27 8) Laboratório de Mosquitos Transmissores de Hematozoários. Instituto Oswaldo Cruz (IOC),  
28 Fiocruz, Rio de Janeiro/RJ, 21040-360, Brazil

29 9) Laboratório de Pesquisa em Malária, IOC, Fiocruz, Rio de Janeiro/RJ, 21040-360, Brazil

30 10) Universidade Regional de Blumenau (FURB), Centro de Pesquisas Biológicas de Indaial  
31 (CEPESBI)/ Projeto bugio, Blumenau and Indaial, SC, Brazil.

32 11) Centro de Primatologia do Rio de Janeiro (CPRJ/Inea), 25940-000, Guapimirim, RJ,  
33 Brazil

34 12) Centre de Biochimie Structurale, CNRS, INSERM, Université de Montpellier, 34090  
35 Montpellier, France

36 13) Malaria Unit, Department of Pathology, Institute of Tropical Medicine (NEKKEN),  
37 Nagasaki University, 1-12-4 Sakamoto, Nagasaki, 852-8523, Japan

38 14) Global Station for Zoonosis Control, Global Institution for Collaborative Research and  
39 Education (GI-CoRE), Hokkaido University, N20 W10 Kita-ku, Sapporo, Japan

40 15) Nuffield Division of Clinical Laboratory Sciences (NDCLS), University of  
41 Oxford, Headington, Oxford, OX3 9DU, UK

42

43 §) Contributed equally, arranged alphabetically

44 †) Corresponding authors

45

46

#### 47 **Summary**

48

49 *Plasmodium simium*, a malaria parasite of non-human primates in the Atlantic forest region of  
50 Brazil was recently shown to cause zoonotic infection in humans in the region. Phylogenetic  
51 analyses based on the whole genome sequences of six *P. simium* isolates infecting humans  
52 and two isolates from brown howler monkeys revealed that *P. simium* is monophyletic within  
53 the broader diversity of South American *Plasmodium vivax*, consistent with the hypothesis  
54 that *P. simium* first infected non-human primates as a result of a host-switch from humans  
55 carrying *P. vivax*. We provide molecular evidence that the current zoonotic infections of  
56 people have likely resulted from multiple independent host switches, each seeded from a  
57 different monkey infection. Very low levels of genetic diversity within *P. simium* genomes  
58 and the absence of *P. simium*-*P. vivax* hybrids suggest that the *P. simium* population emerged  
59 recently and has subsequently experienced a period of independent evolution in Platyrrhini  
60 monkeys. We further find that Plasmodium Interspersed Repeat (PIR) genes, Plasmodium  
61 Helical Interspersed Subtelomeric (PHIST) genes and Tryptophan-Rich Antigens (TRAg)  
62 genes in *P. simium* are genetically divergent from *P. vivax* and are enriched for non-  
63 synonymous single nucleotide polymorphisms, consistent with the rapid evolution of these  
64 genes. Analysis of genes involved in erythrocyte invasion revealed several notable differences  
65 between *P. vivax* and *P. simium*, including large deletions within the coding region of the  
66 Duffy Binding Protein 1 (DBP1) and Reticulocyte Binding Protein 2a (RBP2a) genes in *P.*  
67 *simium*. Genotyping of *P. simium* isolates from non-human primates (NHPs) and zoonotic

67 human infections showed that a precise deletion of 38 amino acids in DBP1 is exclusively  
68 present in all human infecting isolates, whereas non-human primate infecting isolates were  
69 polymorphic for the deletion. We speculate that these deletions in the parasite-encoded key  
70 erythrocyte invasion ligands and the additional rapid genetic changes have facilitated zoonotic  
71 transfer to humans. Non-human primate malaria parasites can be considered a reservoir of  
72 potential infectious human parasites that must be considered in any attempt of malaria  
73 elimination. The genome of *P. simium* will thus form an important basis for future functional  
74 characterizations on the mechanisms underlying malaria zoonosis.

75

76

## 77 **Introduction**

78

79 There are currently eight species of malaria parasites known to cause disease in humans;  
80 *Plasmodium falciparum*, *Plasmodium vivax*, *Plasmodium malariae*, *Plasmodium ovale*  
81 *curtisi*, *Plasmodium ovale wallikeri*, *Plasmodium knowlesi*, *Plasmodium cynomolgi* and  
82 *Plasmodium simium*. The latter three species are more commonly parasitic on non-human  
83 primates and have only relatively recently been shown to infect humans<sup>1-3</sup>.

84

85 As interventions against human malaria parasites, particularly *P. falciparum* and *P. vivax*,  
86 continue to reduce their prevalence, the increasing importance of zoonotic malaria is  
87 becoming apparent. In countries currently moving towards the elimination of malaria, the  
88 presence of populations of potentially zoonotic parasites in non-human primates constitutes a  
89 significant obstacle.

90

91 The propensity of malaria parasites to switch hosts and the consequences of this for human  
92 health are underlined by the fact that both *P. vivax* and *P. falciparum* first arose as human  
93 pathogens as the result of host switches from great apes in Africa<sup>4-6</sup>. As contact between  
94 humans and the mosquitoes that feed on non-human primates increases due to habitat  
95 destruction and human encroachment into non-human primate habitats<sup>7</sup>, there is increasing  
96 danger of zoonotic malaria transmission leading to the emergence of novel human malaria  
97 pathogens. Understanding how malaria parasites adapt to new hosts and new transmission  
98 environments allows assessment of the risks posed by novel zoonotic malaria outbreaks.

99

100 The clinical epidemiology of zoonotic malaria varies according to the parasite species  
101 involved and the demographics of the human-host population infected. Severe and lethal  
102 outcomes have been reported in people infected with *P. knowlesi* in Malaysia <sup>8</sup>, whilst  
103 infection with *P. cynomolgi* in the same region appears to cause moderate/mild clinical  
104 symptoms <sup>9</sup>. Interestingly, both *P. knowlesi* and *P. cynomolgi* infections in the Mekong region  
105 appear less virulent than in Malaysia, and are often asymptomatic <sup>3,10</sup>, and this may be due to  
106 the relative virulence of the parasite strains circulating there and/or differences in the  
107 susceptibility of the local human populations. As the parasites of non-human primates have  
108 co-evolved with and adapted to their monkey hosts, it is impossible to predict their potential  
109 pathogenesis in zoonotic human infections. The virulence of *P. falciparum*, for example, has  
110 been attributed to its relatively recent emergence as a human pathogen <sup>11</sup>, which appears to  
111 have occurred following a single host transfer from a gorilla in Africa <sup>5</sup>.

113 Eighty nine percent of the malaria infections in Brazil are caused by *P. vivax*, with over 99%  
114 of these cases occurring in the Amazonian region. This region accounts for almost 60% of the  
115 area of Brazil, and is home to 13% of the population (<https://www.ibge.gov.br/>). Of the 0.4%  
116 of cases registered outside the Amazon, around 90% occur in the Atlantic Forest, a region of  
117 tropical forest that extends along the Atlantic coast of Brazil, and are caused by an apparently  
118 mild, vivax-like malaria parasite transmitted by *Anopheles (Kerteszia) cruzii*, a mosquito  
119 species that breeds in the leaf axils of bromeliad plants <sup>12</sup>.

121 Following a malaria outbreak in the Atlantic Forest of Rio de Janeiro in 2015/2016, it was  
122 shown that these infections were caused by the non-human primate malaria parasite *P. simium*  
123 <sup>1</sup>. DNA samples collected both from humans and non-human primates (NHPs) in the same  
124 region shared identical mitochondrial genome sequences, distinct from *P. vivax* isolates from  
125 anywhere in the world and identical to that of a *P. simium* parasite isolated from a monkey in  
126 the same region in 1966, and to all isolates of *P. simium* recovered from NHPs since <sup>13,14</sup>.

128 It was previously thought that *Plasmodium vivax* became a parasite of humans following a  
129 host switch from macaques in Southeast Asia, due to its close phylogenetic relationship with a  
130 clade of parasites infecting monkeys in this region and due to the high genetic diversity  
131 among *P. vivax* isolates from Southeast Asia <sup>15</sup>. We now know, however, that it became a  
132 human parasite following a host switch from great apes in Africa <sup>6</sup>. It is likely that it was  
133 introduced to the Americas by European colonisers following Columbus' journey to the New

134 World in 1492. Indeed, present-day *P. vivax* in South America is closely related to a strain of  
135 the parasite present, historically, in Spain <sup>16</sup>. The genetic diversity of extant *P. vivax* in the  
136 Americas suggests multiple post-Columbian colonising events associated with the passage of  
137 infected people from various regions throughout the world <sup>17</sup>. There is some evidence to  
138 suggest that *P. vivax* parasites may also have been introduced to South America in pre-  
139 Columbian times, and may have contributed to the extensive genetic diversity of the parasite  
140 on this continent <sup>17</sup>.

141  
142 *Plasmodium simium*, a parasite of various species of Platyrrhini monkeys whose range is  
143 restricted to the Atlantic Forest of south and southeast Brazil <sup>18</sup>, is genetically and  
144 morphologically similar to *P. vivax* <sup>1,19-22</sup>. Based on this similarity, it appears likely that *P.*  
145 *simium* originated as a parasite of monkeys in Brazil following a host switch from humans  
146 carrying *P. vivax*. The recent 2015/2016 outbreak of *P. simium* in the local human population  
147 of Rio de Janeiro's Atlantic Forest raises questions about the degree of divergence that has  
148 occurred between *P. vivax* and *P. simium*, and whether adaptation to monkeys has led to the  
149 evolution of a parasite with clinical relevance to human health that differs from that of *P.*  
150 *vivax*.

151  
152 It is unclear whether the current outbreak of *P. simium* in the human population of Rio de  
153 Janeiro was the result of a single transfer of the parasite from a monkey to a human and its  
154 subsequent transfers between people, or whether multiple independent host switches have  
155 occurred, each seeded from a different monkey infection. Furthermore, the degree and nature  
156 of adaptation to a non-human primate host and a sylvatic transmission cycle that has occurred  
157 in *P. simium* following its anthroponotic origin is of relevance to the understanding of how  
158 malaria parasites adapt to new hosts. It is also of interest to determine whether the current,  
159 human-infecting *P. simium* parasites have recently undergone changes at the genomic level  
160 that have allowed them to infect people in this region, as it has previously been suggested that  
161 *P. simium* has historically lacked the ability to infect man <sup>23</sup>.

162  
163 In order to resolve these questions, and so to better understand the epidemiology and natural  
164 history of this emerging zoonotic parasite, we analysed the whole genome sequences of *P.*  
165 *simium* parasites isolated from both humans and non-human primates in the Atlantic Forest  
166 region of Rio de Janeiro.  
167

168

169

## 170 **Results**

170

171

### 171 **Genome assembly and phylogeny**

172

172 From a single *P. simium* sample collected from Rio de Janeiro state in 2016<sup>1</sup> short read  
173 sequences were obtained and assembled into a draft genome (see Supplementary Materials).

174

174 The assembled genome consists of 2,192 scaffolds over 1kb with a combined size of 29 Mb  
175 (Table S1). Two scaffolds corresponding to the apicoplast and mitochondrial organelles are  
176 also identified (Figure S1). Gene content analysis showed an annotation completeness  
177 comparable to previously published *Plasmodium* assemblies (Figure S35). A phylogenetic  
178 tree constructed from 3,181 of 1:1 orthologs of the annotated *P. simium* protein-coding genes  
179 with *Plasmodium vivax*, *P. cynomolgi*, *P. coatneyi*, *P. knowlesi*, *P. malariae*, *P. falciparum*,  
180 *P. reichenowi*, and *P. gallinaceum* confirmed that *P. simium* is very closely related to *P. vivax*  
181 (Figure S2).

182

### 183 ***P. simium*-*P. vivax* diversity analysis**

184 To detect single nucleotide polymorphisms (SNPs) within the *P. vivax*/*P. simium* clade, short  
185 Illumina paired-end sequence reads were mapped onto the *P. vivax* P01 reference genome<sup>24</sup>.  
186 Reads were collected from eleven human *P. simium* samples, two monkey *P. simium* samples,  
187 two *P. vivax* samples from Brazilian Amazon, and a range of *P. vivax* strains representing a  
188 global distribution retrieved from the literature<sup>25</sup>. Including only SNPs with a minimum depth  
189 of five reads, a total of 232,780 SNPs were initially called across 79 samples. Sixteen samples  
190 were subsequently removed from further analysis primarily due to low coverage resulting in a  
191 total of 63 samples (Table S2, Table S3). Few SNP loci are covered across all samples, and to  
192 enable diversity analysis, we restrict all further analysis to the 124,968 SNPs for which data is  
193 available from at least 55 samples (Figure S3).

194

### 195 ***P. simium*-*P. vivax* population analysis**

196 A Principal Component Analysis (PCA) plot constructed from these genome-wide SNP loci  
197 showed a clear separation between American and Asian *P. vivax* samples as well as a distinct  
198 grouping of *P. simium* samples (Figure S4). The latter observation suggesting that both  
199 human and monkey *P. simium* samples form a single population that is genetically  
200 differentiated from other American *P. vivax* populations. A similar pattern is observed when  
201 performing a multidimensional scaling analysis of the SNP data (Figure S5). To enable a

202 phylogenetic approach, we constructed an alignment from the 124,968 SNP sites. In the  
203 resulting phylogenetic tree, *P. vivax* strains generally clustered according to their geographical  
204 origin, and the Asian and American samples were clearly separated (Figure 1A, a tree with  
205 sample IDs is available in Figure S6). *P. simium* samples clustered as a monophyletic group  
206 with Mexican vivax samples (Figure 1A), consistent with a recent American origin for *P.*  
207 *simium*.

208

209 To examine whether the *P. simium* isolates we obtained were part of a continuous population  
210 with local *P. vivax*, we examined population ancestry with the ADMIXTURE program<sup>26</sup>  
211 (Figure S7). This analysis is consistent with the PCA and MDS analysis (Figure S4 & Figure  
212 S5) and the phylogenetic analysis of segregating SNPs (Figure 1), showing that *P. simium*  
213 forms a genetically distinct population of *P. vivax*. The absence of *P. simium*-*P. vivax* hybrids  
214 (introgression events) suggests that *P. simium* has undergone a period of independent  
215 evolution in Platyrrhini monkeys.

216

### 217 ***P. simium* genetic differentiation from *P. vivax* is enhanced in host-parasite interacting** 218 **genes**

219 To characterise the *P. simium* population further, we estimated the nucleotide diversity in *P.*  
220 *simium* and *P. vivax* samples (see Materials and Methods). *P. simium* diversity (genome-  
221 median:  $1.3 \times 10^{-4}$ ) is more than five times lower than the diversity observed when comparing  
222 all *P. vivax* samples (genome-median:  $7.5 \times 10^{-4}$ ) (Figure 2). Diversity within coding sequences  
223 in *P. vivax* is consistent with previous reports<sup>6</sup>. The median nucleotide diversity between *P.*  
224 *simium* and *P. vivax* genomes of  $8.4 \times 10^{-4}$  and the low diversity within *P. simium* suggest that  
225 the strains we examined are part of a relatively recent or isolated population.

226

227 We then examined the population differentiation over the entire genome using  $F_{ST}$ , a measure  
228 of the proportion of ancestry private to a population ( $F_{ST}=0$  for completely intermixed  
229 populations,  $F_{ST}=1$  for populations with completely independent ancestry). Although our  
230 analysis contains very few samples,  $F_{ST}$  estimates can be very accurate if multiple genomic  
231 sites are used<sup>27</sup>. Consistent with phylogenetic and admixture analysis, we observed a high  
232 level of differentiation between human *P. simium* and American *P. vivax* ( $F_{ST}=0.46$ ). For  
233 comparison, the differentiation between vivax from America and vivax from Myanmar and  
234 Thailand (henceforth referred to as 'Asian vivax') is less than half of this ( $F_{ST}=0.22$ ). To  
235 examine whether there were any signals of adaptive change in *P. simium* that may have

236 occurred during its adaptation in monkeys upon anthroponotic transfer, we calculated the  
237 fixation index for all individual genes. Clearly, the small number of samples renders this  
238 analysis prone to false and incorrect signals, and  $F_{ST}$  values for individual genes should be  
239 interpreted with caution. Nevertheless, we attempted to look for general patterns in  $F_{ST}$  values  
240 across gene groups.

241

242 Amongst the 4,341 *P. vivax* genes with at least one SNP in our data set, we examined the top-  
243 25% of the genes with highest  $F_{ST}$  values for enrichment in functional Gene Ontology (GO)  
244 terms or metabolic pathways. No GO terms or pathways were significant at the 0.05 level  
245 after Bonferroni correction (Table S4 & Table S5). Using the *P. falciparum* orthologs instead  
246 – when available – gave similar results (not shown). We next tested if any of the gene families  
247 (Figure S8, Figure S9, Table S6) were associated with high  $F_{ST}$  values. Genes belonging to  
248 the Plasmodium Interspersed Repeat (PIR) family involved in antigenic variation<sup>28</sup>, the  
249 Plasmodium Helical Interspersed Subtelomeric (PHIST) genes, a family of exported proteins  
250<sup>29</sup>, the merozoite surface proteins MSP7<sup>30</sup>, and Tryptophan-rich antigens (TRAg)<sup>31</sup> were  
251 enriched among the genes with high  $F_{ST}$  values (binomial distribution, PIR;  $p=3.5\times 10^{-3}$ ,  
252 PHIST;  $p=4.1\times 10^{-4}$ , MSP7;  $p=0.034$ , TRAg;  $p=2.5\times 10^{-3}$ ).

253

254 As these gene families are involved in parasite-host interactions, the observation of elevated  
255  $F_{ST}$  values may simply reflect a general pattern of rapid genetic divergence in *Plasmodium*  
256 parasites. To test this, we repeated the  $F_{ST}$  analysis between American vivax and a selection of  
257 Asian vivax isolates (Myanmar and Thailand samples only). Consistent with the phylogenetic  
258 analysis (Figure 1A) gene  $F_{ST}$  was slightly higher overall between simium and American  
259 vivax than between American and Asian vivax samples (Figure 3A). However, none of the  
260 gene families were overrepresented among genes with high  $F_{ST}$  (top-25%) between American  
261 and Asian vivax. To further examine if the elevated  $F_{ST}$  measures found for PIR, PHIST,  
262 MSP7, and TRAg genes are exclusive to the comparison between simium and American  
263 vivax, we calculated the ratio between the two  $F_{ST}$  measurements ('simium versus American  
264 vivax' and 'American versus Asian vivax') (Figure 3B). The ratios for PIR, PHIST and TRAg  
265 genes were significantly higher than observed for the remaining genes (Figure 3C), whereas  
266 ratios for MSP7 genes were not (Mann-Whitney U,  $p=0.12$ ). Although the *P. simium* and the  
267 *P. vivax* P01 both genomes encode a high number of the gene family members, our analysis is  
268 restricted to the *P. vivax* genes for which our *P. simium* short read sequences can map. For  
269 example, only 408 out of the 1209 *P. vivax* PIR genes have coverage from *P. simium* reads



270 across at least 80% of their gene length (Figure S10). Further, an even smaller number of  
271 these genes have detectable SNPs between simium and American vivax samples and are  
272 included in the analysis (numbers shown below Figure 3B).

273

274 To test if the sequence redundancy among gene family loci could result in spurious cross-  
275 mapping of short sequence reads we specifically tested the quality of SNPs in gene families,  
276 and SNPs residing in gene families showed no signs of decreased calling, mapping, or base  
277 qualities compared to other SNPs (Figure S11).

278

279 A phylogenetic analysis of PIR, PHIST and TRAg proteins harbouring genomic SNPs  
280 revealed no apparent association between certain protein phylogenetic sub-groups and high  
281  $F_{ST}$  ratios (Figure S12-S14), consistent with a subtle signature of polygenic adaptation in  
282 these gene families.

283

284 When testing all exported genes and genes involved in invasion and exported genes (Table  
285 S8), the observed  $F_{ST}$  ratios were not significantly different from the background (Mann-  
286 Whitney U,  $p=0.5473$ ). Hence, the differences in  $F_{ST}$  observed for PIR, PHIST and TRAg  
287 genes are not a general phenomenon amongst the genes known to be involved in interactions  
288 with the host and red cell invasion.

289

290 The observed skew towards higher  $F_{ST}$  values when comparing simium and American vivax  
291 (Figure 3A) could be a result of an inherent diversity between different American vivax  
292 populations potentially stemming from multiple introductions of *P. vivax* to the American  
293 continent<sup>17</sup>. To test if such founder effects and subsequent population bottlenecks could  
294 explain the observations, we repeated the  $F_{ST}$  analysis using only Mexican vivax samples as  
295 American representatives. Four Mexican samples (SRS693273, SRS694229, SRS694244,  
296 SRS694267) were used. These clustered close together in both the SNP phylogeny (Figure 1)  
297 and in the PCA and MDS plots (Figure S4 & Figure S5), and are assumed to share a recent  
298 evolutionary history. This analysis revealed the same pattern of elevated  $F_{ST}$  values between  
299 simium and Mexican vivax, and PIR genes did again display significantly higher  $F_{ST}$  ratios  
300 (Figure S15). Although PHIST and TRAg genes also showed higher  $F_{ST}$  ratios, these were no  
301 longer significant (Figure S15). We therefore conclude that the observed higher  $F_{ST}$  values  
302 between simium and American vivax PIR genes are not solely a result of diversity within  
303 American vivax populations, but rather appear specific to comparisons with *P. simium*.

304

305 Adaptive changes in PIR genes would be expected to produce stronger genetic divergence in  
306 non-synonymous codon positions. To examine this, we divided genic SNPs into synonymous  
307 and non-synonymous changes. In PIR genes, there are 353 non-synonymous and 185  
308 synonymous SNPs (non-synonymous to synonymous SNP ratio = 1:1.91). Similarly, in  
309 PHIST and TRAg genes we find 220 and 103 non-synonymous, respectively, and 67 and 41  
310 synonymous SNPs, respectively (PHIST ratio = 1:3.28, TRAg ratio = 1:2.51). In all other  
311 genes, the ratio between non-synonymous and synonymous SNPs is 1:1.49. Hence, the  
312 proportion of non-synonymous SNPs in PIR, PHIST and TRAg genes is significantly higher  
313 than in all other genes (chi-square, PIR;  $p = 0.0073$ , PHIST;  $p = 9.4 \times 10^{-9}$ , TRAg;  $p = 0.0054$ ).

314

315 Our finding that PIR, PHIST and TRAg genes overall display markedly higher  $F_{ST}$  values  
316 between *simium* and *vivax* suggest that these gene groups are enriched for private alleles  
317 consistent with natural selection acting upon these genes subsequent to the split between *P.*  
318 *simium* and *P. vivax*.

319

### 320 ***P. simium* invasome components**

321 In invading *P. vivax* merozoites, binding to host red blood cells is mediated by two gene  
322 families: Duffy Binding Proteins (DBPs) bind the Duffy Antigen Receptor for Chemokines  
323 (DARC)<sup>32,33</sup>, which is present on both host normocytes and reticulocytes, whereas  
324 Reticulocyte Binding Proteins (RBPs) preferentially bind host reticulocytes<sup>34-36</sup>. Recently, the  
325 reported protein structure of *P. vivax* RBP2b revealed the evolutionary conservation of  
326 residues involved in the invasion complex formation<sup>36</sup>. Two DBPs, DBP1 and DBP2, are  
327 present in *P. vivax* P01 (Table S9). RBPs can be divided into three subfamilies, RBP1, RBP2,  
328 and RBP3<sup>37</sup>. The *P. vivax* P01 genome encodes 11 RBPs (including the reticulocyte binding  
329 surface protein, RBSA), of which three are pseudogenes (Table S9).

330

331 The *P. vivax* DBP and RBP were used to search the *P. simium* proteins, resulting in the  
332 detection of the two DBP proteins and RBP1a, RBP1b, RBP2a, RBP2b, and RBP3 and failure  
333 to detect RBP2c and RBP2d (Figure 4; Table S9; Figure S16; Figure S17) across all  
334 sequenced *P. simium* samples. As in other *P. vivax* genomes, the *P. simium* RBP3 is a  
335 pseudogene<sup>38</sup>, indicating that the pseudogenization event happened prior to the split between  
336 *P. vivax* and *P. simium*.

337

338 To determine whether the apparent absences of individual RBP genes in *P. simium* were due  
339 to incomplete genome assembly, we examined the coverage of *P. simium* reads mapped onto  
340 *P. vivax* RBP gene loci. As expected, no *P. simium* coverage was observed at the RBP2c,  
341 RBP2d, and RBP2e genes in *P. simium* samples, including the previously published CDC  
342 strain deposited in GenBank (accession ACB42432)<sup>39</sup> (Figure S18).

343

344 Coverage of mapped reads across invasive gene loci revealed no apparent elevated coverage  
345 in genes compared to their flanking genomic regions, which would otherwise be expected if  
346 the *P. simium* genome contained multiple (duplicated) copies of non-assembled invasion  
347 genes (Figure S19). Similarly, analysis of *P. simium* read mapping data using the DELLY  
348 software<sup>40</sup> showed no large genomic duplications and deletions events occurring at loci  
349 harbouring invasion genes (Table S10) although numerous short indels were detected within  
350 protein-coding genes (Table S11).

351

### 352 **Structural variation in *P. simium* Duffy Binding Protein 1**

353 The *simium* assembly revealed that the invasion gene DBP1 contains a large deletion within  
354 its coding sequence (Figure 4) (a full alignment is provided in Figure S20). Intriguingly, the  
355 previously published *P. simium* CDC strain (originally isolated in 1966) DBP1 does not  
356 contain the deletion ('*simium* CDC' in Figure 4B). A haplotype network confirms that this  
357 previously published DBP1 gene is indeed a *P. simium* sequence (Figure S22), and the SNP  
358 analyses consistently assign the CDC strain to the *simium* cluster (Figure 1, Figure S4, and  
359 Figure S5). Compared to the *P. vivax* P01 reference genome the SalI reference harbours a 27  
360 base pair deletion in DBP1, in contrast to the 115 bp deletion observed in all *P. simium*  
361 samples isolated from humans (Figure 4). This deletion is also present in most *P. vivax*  
362 isolates (Figure S23). Additional deletion patterns exist among isolates, and in a few cases  
363 multiple versions are detected within samples (Figure S23).

364

365 The presence of repetitive sequences within the DBP1 gene could potentially result in  
366 aberrant assembly across the DBP1 locus, which could appear as an apparent deletion in  
367 subsequent bioinformatic analysis. We tested this possibility and the DBP1 gene does not  
368 harbour any noticeable degree of repetitiveness (Figure S24). Several read mapping analyses  
369 confirmed that the *P. simium*-specific 115 bp deletion was not an assembly artefact (Figure  
370 S25-S27).

371

372 We next designed primers for PCR amplification of a genomic segment across the deleted  
373 region in the *P. simium* DBP1 gene and tested the occurrence of these deletion events in a  
374 range of *P. vivax* and *P. simium* field samples from Brazil. All *P. vivax* samples tested by  
375 PCR produced bands consistent with absence of the deletion whereas all samples from  
376 human-infecting *P. simium* produced bands consistent with the presence of the precise 115 bp  
377 deletion (Figure S28, top & middle). Interestingly, non-human primate (NHP)-infecting *P.*  
378 *simium* isolates were a mix of samples with and without deletions (Figure S28, bottom). If the  
379 *P. simium*-specific deletion in DBP1 is a prerequisite for the ability to infect humans this  
380 suggests that only a subset of NHP-infecting *P. simium* parasites currently possess the DBP1  
381 allele required for zoonotic transfer to humans.

382

383 A large, additional deletion was observed in the *P. simium* RBP2a gene, the presence of  
384 which was also supported by read mapping and PCR analysis (Figure 3, Figure S29-S32).

385

386

#### **Potential structural implications of the deletion in DBP1 and RBP2a**

387 We next investigated if the observed deletions render DBP1 and RBP2a dysfunctional. DBP1  
388 contains a large extracellular region, which includes the N-terminal DBL region which is  
389 mediating the association with DARC in *P. vivax*<sup>41</sup>, followed by a largely disordered region  
390 and a cysteine-rich domain (Figure 4c). DBP1 has a single-pass transmembrane helix and a  
391 short cytoplasmic tail. The deletion observed in the human-infecting *P. simium* only affects  
392 the disordered region, leaving the flanking domains intact. We produced homology models of  
393 the DBL domains from the *P. vivax* strain P01, the human-infecting *P. simium* strain AF22,  
394 and the *P. simium* CDC strain, based on the crystal structure of the >96% identical DBL  
395 domain of *P. vivax* bound to DARC (PDB ID 4nuv). Whereas no significant substitutions  
396 were found in the DBL domain between both *P. simium* sequences, our analysis showed that  
397 residue substitutions between *P. simium* and *P. vivax* DBL domains cluster in proximity of the  
398 DARC binding site (Figure S33). Based on our models, these substitutions are unlikely to  
399 negatively affect the association with DARC, supporting that the DBL domains of both *P.*  
400 *simium* would be capable of binding to human DARC. Hence, the human-infecting *P. simium*  
401 sequence encodes for a protein that retains the capacity to bind to human DARC, but would  
402 have the interacting domain positioned closer to the membrane than in the monkey-infecting  
403 CDC strain.

404

405 The deletion we detected in human-infecting RBP2a was more severe, resulting in the loss of  
406 1003 residues. These residues are predicted to form a mostly  $\alpha$ -helical extracellular stem-like  
407 structure that positions the reticulocyte binding domain away from the membrane (Figure 4d).  
408 However, given that the deletion does neither affect the transmembrane region, nor the  
409 receptor-binding domain, our analysis supports that the resulting truncated RBP2a protein can  
410 still associate with the human receptor, but that the binding event would occur closer to the  
411 plasmodium membrane.  
412

413

414

## **Discussion**

415

416 We present the genome of *Plasmodium simium*, the eighth malaria parasite species known to  
417 infect humans in nature. In recent evolutionary time, *P. simium* has undergone both  
418 anthroponosis and zoonosis making it unique for the study of the genetics underlying host-  
419 switching in malaria parasites. The genome content confirmed the close phylogenetic  
420 relationship between *P. simium* and *P. vivax*, and further analyses on single nucleotide  
421 divergences support a very recent American origin for *P. simium*. This recent split between *P.*  
422 *vivax* and *P. simium* precludes detection of genes under positive evolution<sup>42</sup>, and we have  
423 instead performed a general analysis of population differentiation between extant *P. simium*  
424 and *P. vivax* isolates using  $F_{ST}$ . We find that members of three gene families involved in  
425 antigenic variation, PIR, PHIST and TRAg, show significantly elevated  $F_{ST}$  levels between *P.*  
426 *simium* and *P. vivax*. As higher  $F_{ST}$  values amongst these genes are not observed between  
427 global vivax populations, their genetic differentiation appears to be associated with host-  
428 switching between human and monkey.

429

430

431 Two proteins involved in host invasion, DBP1 and RBP2a, were found to harbour extensive  
432 deletions in *P. simium* compared to *P. vivax*. Interestingly, experimental analysis of *P. simium*  
433 samples revealed that isolates from human hosts all carried the DBP1 deletion, whereas  
434 isolates from non-human primates displayed both absence and presence of the deletion. This  
435 DBP1 deletion is not present in the *P. simium* isolated from a brown howler monkey in the  
436 1960s, which was previously shown to be incapable of infecting humans<sup>23</sup>, although some  
437 degree of laboratory adaptation of this parasite may have affected its genome. However, this  
deletion is also absent in *P. vivax*, so cannot in itself explain the ability of *P. simium* to infect

438 humans in the current outbreak. It is possible, however, that this deletion is required for *P.*  
439 *simium* to invade human red blood cells given the alterations that have occurred elsewhere in  
440 its invasome following adaptation to non-human primates since the split between *P. simium*  
441 and its human-infecting *P. vivax* ancestor.  
442

443 Invasome proteins are obvious candidates for genetic factors underlying host-specificity, and  
444 an inactivating mutation in a *P. falciparum* erythrocyte binding antigen has recently been  
445 shown to underlie host-specificity<sup>43</sup>. Traditionally, functional studies on invasome proteins  
446 have focused on domains known to bind or interact directly with the host. Although the *P.*  
447 *simium*-specific DBP1 and RBP2a deletions reported here do not cover known structural  
448 motifs, these deletions could nevertheless affect host cell recognition as disordered protein  
449 regions have known roles in cellular regulation and signal transduction<sup>44</sup>. Further, a shorter,  
450 less flexible linker between the plasmodium membrane and the receptor-binding DBP1  
451 domain may favour a more rigid and better oriented positioning of the dimeric DBP1,  
452 enhancing its capacity to engage the human receptor.  
453

454 Phylogenetic analysis of the *P. simium* clade gives the geographical location of its most  
455 closely related *P. vivax* strain as Mexico, and not Brazil. In imported populations, the  
456 relationship between geographical and genetic proximity may be weak. Multiple introductions  
457 of diverse strains from founder populations may occur independently over large distances, so  
458 that two closely related strains may be introduced in distantly located regions. It may be  
459 postulated that there occurred the introduction of strains of *P. vivax* to Mexico from the Old  
460 World that were closely related, due to similar regions of origin, to strains introduced to the  
461 Atlantic Forest which went on to become *P. simium* in New World monkeys. Strains from a  
462 different point of origin were introduced to the Amazonian region of Brazil. This hypothesis  
463 necessitates reproductive isolation of the *P. simium* clade from the Brazilian *P. vivax* parasites  
464 following their initial introduction; an isolation that would be facilitated, presumably, by their  
465 separate host ranges.  
466

467 Due to uncertainties regarding the number of individual genomes that were transferred during  
468 the original host switch from man to NHPs that resulted in the formation of the *P. simium*  
469 clade, it is impossible to perform dating analyses to determine a time for the split between *P.*  
470 *vivax* and *P. simium* with which we can be confident. The phylogeny shown in figure 1 is  
471 consistent with the hypothesis that all present-day *P. vivax/P. simium* originated from a now

472 extinct Old World population. The most parsimonious explanation for this is that today's New  
473 World *P. vivax*/*P. simium* originated from European *P. vivax*, which was itself a remnant of  
474 the original Eurasian/African *P. vivax* driven to extinction in Africa by the evolution of the  
475 Duffy negative condition in the local human populations, and from Europe by malaria  
476 eradication programmes in the latter half of the twentieth century. This hypothesis is  
477 supported by the evidence of a close relationship between historical Spanish *P. vivax* and  
478 South American strains of the parasite <sup>16</sup>, and by previous analyses of the mitochondrial  
479 genome <sup>45</sup>. Therefore, we postulate that the host switch between humans and non-human  
480 primates that eventually led to establishment of *P. simium* in howler monkeys must have  
481 occurred subsequent to the European colonisation of the Americas, within the last 600 years.  
482

483 We find no evidence from the nuclear genome, the mitochondrial genome or the apicoplast  
484 genome that any of the *P. vivax* /*P. simium* strains from the New World considered in our  
485 analyses are more closely related to Old World parasites than they are to each other, as  
486 previously contended <sup>46</sup>. However, our nuclear genome phylogeny is based on genome-wide  
487 SNPs, and so represents an “average” phylogeny across the genome. This cannot be  
488 considered to reflect a true history of parasite ancestry due to the effects of recombination,  
489 and it is possible that trees produced from individual genes might reveal different  
490 phylogenetic relationships.  
491

492 Given the limited genetic diversity amongst the *P. simium* isolates considered here compared  
493 to that of *P. vivax*, it is almost certain that the original host switch occurred from humans to  
494 NHPs, and not the other way around <sup>22</sup>. Similarly, the larger amount of genetic diversity in the  
495 current NHP-infecting *P. simium* compared to those *P. simium* strains isolated from humans  
496 (as indicated by the higher degree of DBP1 polymorphism in the NHP-infecting *P. simium*  
497 compared to the strains infecting humans), suggests that humans are being infected from a  
498 pool of NHP parasites in a true zoonotic manner, as opposed to the sharing of a common  
499 parasite pool between humans and NHPs  
500

501 The biological definition of a species is a group of organisms that can exchange genetic  
502 material and produce viable offspring. We have no way of knowing whether this is the case  
503 for *P. vivax* and *P. simium*, and genetic crossing experiments would be required to resolve this  
504 question. Our phylogenetic analysis, however, clearly shows *P. simium* forming a clade on its  
505 own within the broader diversity of *P. vivax*, and that strongly suggests, given what we know

506 about its biology, that allopatric speciation has been/is occurring. *Plasmodium simium* appears  
507 to have been reproductively isolated from other strains of *P. vivax* for long enough for  
508 significant genetic differentiation to occur ( $F_{ST} = 0.46$ ), with some invasive genes showing  
509 even higher genetic differentiation.  
510

511 *Plasmodium simium* is currently recognised as a species separate from *P. vivax*; it has been  
512 well characterised and described in the literature, and there is a type specimen available, with  
513 which all the strains sequenced here cluster in one monophyletic group. Therefore, we cannot  
514 at present overturn the species status of *P. simium* in the absence of conclusive proof from  
515 crossing experiments.  
516

517 In summary, the recent outbreak of human malaria in the Atlantic Forest of Rio de Janeiro  
518 underlines the impact of zoonotic events on human health. In this sense non-human primate  
519 malaria parasites can be considered a reservoir of potential infectious human parasites that  
520 must be considered in any attempt of malaria eradication. Little is known about the genetic  
521 basis for zoonosis, yet the presented genome sequence of *P. simium* suggests a deletion within  
522 the DBP1 gene as a possible facilitator of zoonotic transfer. The genome of *P. simium* will  
523 thus form an important basis for future functional characterizations on the mechanisms  
524 underlying malaria zoonosis.  
525

526

527

528

## **Methods**

### **529 Sample Collection and Preparation**

530 Human and primate samples of *P. simium* were collected and prepared as part of a previous  
531 study<sup>1,14</sup>. Additionally, two *P. vivax* samples from the Amazon area of Brazil were also  
532 collected from human patients (Table S2). All participants provided informed written consent.  
533 The *P. simium* CDC (Howler) strain (Catalog No. MRA-353) from ATCC was obtained via  
534 the BEI Resources Repository in NIAID-NIH (<https://www.beiresources.org/>).  
535

### **536 DNA extraction and sequencing**

537 DNA was extracted as described<sup>1</sup>. The genomic DNA for each sample was quantitated using  
538 the Qubit® 2.0 Fluorometer and was used for library preparation. The DNA for intact samples  
539 was sheared using a Covaris E220 DNA sonicator to fragments of 500bp. The DNA libraries



540 for intact samples were made using the TruSeq Nano DNA Library Prep kit (Illumina),  
541 whereas the DNA libraries for degraded samples were made using Ovation Ultralow Library  
542 System V2 kit (Nugen), according to the manufacturers' instructions. The amplified libraries  
543 were stored in -20 °C. The pooled libraries were sequenced in an Illumina HiSeq4000  
544 instrument (2 x 150 bp PE reads) (Illumina). A PhiX control library was applied to the  
545 sequencing run as a base balanced sequence for the calibration of the instrument so that each  
546 base type is captured during the entire run. Raw sequence reads were submitted to FastQC  
547 v.0.11.5 and the quality score of the sequences generated was determined. Samples AF22,  
548 AF26, AF36 were additionally sequenced and scaffolded by PacBio RS II platform (Pacific  
549 Biosciences, California, US) using a SMRT library. Genomic DNA from the *P. vivax* samples  
550 was extracted from filter paper as previously described <sup>47</sup>.

551

### 552 **Illumina reads preparation and mapping**

553 Fastqc v 0.11.6 (<http://www.bioinformatics.babraham.ac.uk/projects/fastqc>) was used to  
554 evaluate the quality of Illumina reads. Illumina adapters were removed, and reads were  
555 trimmed using the trimmomatic v0.33 <sup>48</sup> software with the following conditions:

556 *LEADING:20 TRAILING:20 SLIDINGWINDOW:4:20 MINLEN:36*

557 To exclude human reads from our analysis, trimmed reads were mapped against the human  
558 reference genome (v. hg38) and the *Plasmodium vivax* strain P01 reference genome (v. 36)  
559 from PlasmoDB ([www.plasmodb.org](http://www.plasmodb.org)) with bowtie2 (v 2.3.3.1) <sup>49</sup>. Reads mapping against the  
560 human genome were removed from further analysis.

561

### 562 **Genome Assembly**

563

564 *P. simium* sample AF22 was selected for genome assembly based on read quality and  
565 coverage. After removal of human contaminants, Illumina reads were assembled into contigs  
566 using the Spades (v 3.70) assembler <sup>50</sup>. Contigs assembled into scaffolds running SSPACE (v  
567 3.0) <sup>51</sup> for 15 rounds and gaps filled with Gapfiller (v 1.10) <sup>52</sup>. Scaffolds were subsequently  
568 corrected with Illumina reads using the Pilon (v 1.22) software <sup>53</sup>. Blobtools (v 1.0) (DOI:  
569 10.5281/zenodo.845347) <sup>54</sup> was used to remove any residual contaminant scaffolds. Genome  
570 size and GC content is in line with that of *P. vivax* species (Table S1). Genomic scaffolds  
571 representing the mitochondrial and apicoplast genome were identified through blastn searches  
572 against the corresponding *P. falciparum* and *P. vivax* sequences (Figure S1). The *P. simium*  
573 mitochondrial genome was aligned against a range of previously published *P. vivax* and *P.*  
*simium* mitochondrial genomes <sup>55,56</sup>. A gap-filled region in the alignment where the distal

574 parts of the *P. simium* scaffold were merged was manually deleted. A minimum spanning  
575 haplotype network was produced using PopART<sup>57,58</sup> confirming the authenticity of the *P.*  
576 *simium* mitochondrial genome (Figure S34).

577

### 578 **Genome Annotation**

579 Two approaches were used to annotate the reference *P. simium* AF22 genome. Firstly, the  
580 Maker pipeline (v 2.31.8)<sup>59</sup> was run for two rounds, using ESTs and protein evidence from *P.*  
581 *vivax* and *P. cynomolgi* strain B and *P. falciparum* to generate Augustus gene models.  
582 Secondly, a separate annotation was produced using the Companion web server<sup>60</sup>.  
583 Companion was run using the *P. vivax* P01 reference assembly and default parameters. Basic  
584 annotation statistics are provided in Table S1. The relatively low number of genes (5966) is  
585 lower due to the fragmented and incomplete nature of the *P. simium* assembly (Table S1).  
586 Gene content was estimated using BUSCO<sup>61,62</sup> (v3.0) revealing an annotation completeness  
587 comparable to other Plasmodium genome assemblies (Figure S35).

588

### 589 **PlasmoDB Genome References and Annotations**

590 Genome fasta files, as well as annotated protein and CDS files were obtained from PlasmoDB  
591 for the following species: *P. gallinaceum* 8A, *P. cynomolgi* B and M, *P. knowlesi* H, *P.*  
592 *falciparum* 3D7, *P. reichenowi* G01, *P. malariae* UG01, *P. ovale curtisi* GH01, *P. coatneyi*  
593 Hackeri, *P. vivax* P01 and *P. vivax* Sall. For each species, version 36 was used.

594

### 595 **Orthologous group determination**

596 Amino-acid sequences-based phylogenetic trees were prepared using protein sequences from  
597 the *P. simium* annotation, as well as the protein annotations from 10 malaria species  
598 downloaded from PlasmoDB: *P. vivax* P01, *P. cynomolgi* B, *P. knowlesi* H, *P. vivax*-like  
599 Pvl01, *P. coatneyi* Hackeri, *P. falciparum* 3D7, *P. gallinaceum* 8A, *P. malariae* UG01, *P.*  
600 *ovale curtisi* GH01, and *P. reichenowi* G01. *P. vivax*-like from PlasmoDB version 43, all  
601 other annotations from version 41. A total of 3181 1:1 orthologous genes were identified  
602 using the Proteinortho (v 6.0.3) software<sup>63</sup>. Approximately 88% of the predicted genes in *P.*  
603 *simium* have orthologs in the *P. vivax* P01 (Figure S36).

604

### 605 **Indels in genes**

606 Structural variations were detected using DELLY<sup>40</sup> (v 0.7.9). Coordinates of structural  
607 rearrangements their nearest genes are listed in Table S10. Shorter indels were detected from

608 soft-clipping information in read mapping (using the '-i' option in DELLY)(Table S11). Indels  
609 in exons were further compared to indels present in the *P. simium* AF22 genome assembly,  
610 suggesting a high false discovery rate of DELLY indels compared to assembly indels (Figure  
611 S37).

612

### 613 **Protein phylogeny**

614 Protein sequences were aligned using mafft (v 7.222) <sup>64</sup> and alignments were subsequently  
615 trimmed with trimAl (v 1.2rev59) <sup>65</sup> using the heuristic 'automated1' method to select the best  
616 trimming procedure. Trimmed alignments were concatenated and a phylogenetic tree was  
617 constructed using RAxML (v 8.2.3) <sup>66</sup> with the PROTGAMMALG model.

618

### 619 **SNP calling and analysis**

620 Short sequence reads from 15 simium samples (13 human and 2 monkey) and two vivax  
621 samples, all from this study (Table S2), were aligned against a combined human (hg38) and  
622 *P. vivax* (strain P01, version 39) genome using NextGenMap (v0.5.5) <sup>67</sup>. This was similarly  
623 done for 30 previously published *P. vivax* strains <sup>25</sup> and the Sal1 reference. These data sets  
624 were downloaded from ENA (<https://www.ebi.ac.uk/ena>) (Table S3).

625 Duplicate reads were removed using samtools (v 1.9) <sup>68</sup> and the filtered reads were realigned  
626 using IndelRealigner from the GATK package (v 4.0.11) <sup>69</sup>. SNPs were called independently  
627 with GATK HaplotypeCaller and freebayes (v 1.2.0) <sup>70</sup>, keeping only SNPs with a QUAL  
628 score above 30. The final SNP set were determined from the inter-section between GATK and  
629 freebayes. Allele frequencies and mean coverage across SNP sites are shown in Figure S38.  
630 PCA plot was constructed using plink (v 1.90) <sup>71</sup>, and admixture analysis was done with  
631 Admixture (v 1.3.0) <sup>26</sup>.  $F_{ST}$  values were estimated from nucleotide data with the PopGenome  
632 R package <sup>72,73</sup> using the Weir & Cockerham method <sup>74</sup>. Non-synonymous and synonymous  
633 SNPs were identified using snpeff <sup>75</sup>.

634

### 635 **SNP phylogeny**

636 Alleles from SNP positions with data in 55 samples were retrieved, concatenated, and aligned  
637 using mafft <sup>64</sup>. Tree was produced by PhyML <sup>76,77</sup> with the GTR substitution model selected  
638 by SMS <sup>78</sup>. Branch support was evaluated with the Bayesian-like transformation of  
639 approximate likelihood ratio test, aBayes <sup>79</sup>. Phylogenetic network was made in SplitsTree <sup>80</sup>  
640 using the NeighborNet network <sup>81</sup>.

641

## 642 **Nucleotide diversity**

643 Conventional tools calculating nucleotide diversity directly from the variant call files assumes  
644 that samples are aligned across the entire reference sequence. But as read coverage across the  
645 reference genome was highly uneven between samples (Figure S38), adjustment for this was  
646 required. Coverage across the reference genome was thus calculated for each sample using  
647 samtools mpileup (v 1.9) <sup>68</sup>. For each comparison between two samples, the nucleotide  
648 divergence was calculated as number of detected bi-allelic SNPs per nucleotide with read  
649 coverage of at least 5X in both samples.

650

## 651 **Gene sequence deletions**

652 Exploratory Neighbor-Joining phylogenies produced with CLUSTALW <sup>82,83</sup> and visualized  
653 with FigTree (<https://github.com/rambaut/figtree/>) after alignment with mafft <sup>82</sup>. Pacbio reads  
654 were aligned using Blasr (v 5.3.2) <sup>84</sup>, short Illumina reads using NextGenMap (v0.5.5) <sup>67</sup>.  
655 Dotplots done with FlexiDot (v1.05) <sup>85</sup>.

656

## 657 **Gene families and groups**

658 Exported gene sets were compiled from the literature <sup>86-88</sup>. Invasion genes were retrieved from  
659 <sup>89</sup>. Gene families were assessed in seven Plasmodium genomes (*P. simium*, *P. vivax* Sall, *P.*  
660 *vivax* P01, *P. vivax-like* Pvl01, *P. cynomolgi* M, *P. cynomolgi* B, and *P. knowlesi* H) using the  
661 following pipeline: For all genomes annotated genes were collected for each gene families.  
662 These 'seed' sequences were used to search all proteins from all genomes using BLASTP and  
663 best hits for all proteins were recorded. For each gene family 'seed' sequences were then  
664 aligned with mafft <sup>64</sup>, trimmed with trimAl <sup>65</sup>, and HMM models were then built using  
665 HMMer (<http://hmmer.org/>). For PIR/VIR and PHIST genes, models were built for each  
666 genome independently, for all other gene families a single model was built from all genomes.  
667 These models were then used to search all proteins in all genomes. All proteins with best  
668 BLASTP hit to a 'seed' sequence from a given genome were sorted according to their bit  
669 score. The lowest 5% of hits were discarded and remaining proteins with best hits to a 'seed'  
670 sequence were assigned one 'significant' hit. As all proteins were searched against 'seeds' from  
671 the six annotated genomes (*P. simium* excluded), a maximum of six 'significant' BLAST hits  
672 could be obtained. Similarly, for each HMM model the bottom 25% hits were discarded and  
673 remaining hits were considered 'significant'. The final set of gene families consists of  
674 previously annotated genes and un-annotated genes with at least two 'significant' hits (either  
675 BLASTP or HMM).

676

677

### PCR amplification of DBP1 and RBP2a genes

678 PCR primers were initially designed from alignments between *P. vivax* and *P. simium*  
679 sequences and subsequent tested using Primer-BLAST<sup>90</sup> and PlasmoDB  
680 ([www.plasmodb.org](http://www.plasmodb.org)). For DBP1, the reaction was performed in 10  $\mu$  L volumes containing  
681 0.5  $\mu$  M of each oligonucleotide primer, 1  $\mu$  L DNA and 5  $\mu$  L of Master Mix 2x (Promega)  
682 (0.3 units of Taq Polymerase, 200  $\mu$  M each deoxyribonucleotide triphosphates and 1.5 mM  
683 MgCl<sub>2</sub>). Samples were run with the following settings: 2 minutes of activation at 95°C,  
684 followed by 35 cycles with 30 seconds denaturation at 95°C, 30 seconds annealing at 57°C  
685 ( $\Delta T = -0.2$  °C from 2nd cycle) and 1 minute extension at 72°C, then 5 minutes final extension  
686 at 72°C and hold in 4°C. For RBP2a PCR, the reaction was performed in 10  $\mu$  L volumes  
687 containing 0.5  $\mu$  M of each oligonucleotide primer, 1  $\mu$  L DNA, 0.1  $\mu$  L PlatinumTaq DNA  
688 Polymerase High Fidelity (Invitrogen, 5U/  $\mu$  L), 0.2 mM each deoxyribonucleotide  
689 triphosphates and 2 mM MgSO<sub>4</sub>. The PCR assays were performed with the following cycling  
690 parameters: an initial denaturation at 94°C for 1.5 min followed by 40 cycles of denaturation  
691 at 94°C for 15 sec, annealing at 65°C for 30 sec ( $\Delta T = -0.2$  °C from 2nd cycle) and extension at  
692 68°C for 3.5 min. The temperature was then reduced to 4 °C until the samples were taken. All  
693 Genotyping assays were performed in the thermocycler Veriti 96 wells, Applied Biosystems,  
694 and the amplified fragments were visualized by electrophoresis on agarose gels (2% for DBP1  
695 and 1% for RBP2a) in 1x TAE buffer (40 mM Tris-acetate, 1 mM EDTA) with 5  $\mu$ g/ mL  
696 ethidium bromide (Invitrogen) in a horizontal system (Bio-Rad) at 100 V for 30 min. Gels  
697 were examined with a UV transilluminator (UVP - Bio-Doc System).

698

699

700 To prevent cross-contamination, the DNA extraction and mix preparation were performed in  
701 “parasite DNA-free rooms” distinct from each other. Furthermore, each of these separate  
702 areas has different sets of pipettes and all procedures were performed using plugged pipette  
703 tips. DNA extraction was performed twice on different days. Positive (DNA extracted from  
704 blood from patients with known *P. vivax* infection) and negative (no DNA and DNA extracted  
705 from individuals who have never traveled to malaria-endemic areas) controls were used in  
706 each round of amplification. DNA extracted from blood of a patient with high parasitemia for  
707 *P. vivax* and DNA of *P. simium* of a non-human primate with an acute infection and  
708 parasitemia confirmed by optical microscopy served as positive controls in the PCR assays.  
Primer sequences are provided in Figure S28 and S32.

709

710

### 711 **Structural modelling of DBP1 and RBP2a genes**

712

713

714

715

716

717

718

719

720

721

722

RaptorX<sup>91</sup> was used for prediction of secondary structure and protein disorder. Homology models for the DBL domain of *P. vivax* P01 strain, *P. simium* AF22, and the previously published CDC *P. simium* strain were produced by SWISS-MODEL<sup>92</sup>, using the crystallographic structure of the DBL domain from *Plasmodium vivax* DBP bound to the ectodomain of the human DARC receptor (PDB ID 4nuv), with an identity of 98%, 96% and 96% for *P. vivax*, *P. simium* AF22 and *P. simium* CDC, respectively. QMEAN values were -2.27, -2.04 and -2.03, respectively. The homology model for the reticulocyte binding protein 2 (RBP2a) of *P. vivax* strain P01 was produced based on the cryoEM structure of the complex between the *P. vivax* RBP2b and the human transferrin receptor TfR1 (PDB ID 6d05)<sup>36</sup>, with an identity of 31% and QMEAN value of -2.46. The visualization and structural analysis of the produced models was done with PyMOL (<https://pymol.org/2/>).

723

### 724 **Data availability**

725

726

727

728

729

730

### 731 **Acknowledgements**

732

733

734

735

736

737

738

739

740

741

742

We thank Prof. Xin-zhuan Su at the National Institute of Allergy and Infectious Diseases, NIH, for invaluable help in obtaining the parasite gDNA from the BEI Resources; Sidnei Silva and Graziela Zanini, for assistance on the parasitological diagnosis of the human samples; Aline Lavigne and Larissa Gomes for undertaking the PCR for *P. vivax*; Alcides Pissinatti and Silvia Bahadian Moreira for the facilities provided at the Primate Centre of Rio de Janeiro; Orzinete Rodrigues Soares for non-human primates' blood slides'; Marcelo Quintela, Waldemir Paixão Vargas, Carlos Alberto C. da Silva, Alexandre B. de Souza, Vicente Klonowski, Romenique L. Araújo, Luis R. Nogueira, Fernando Barreto, Ana L. Quijada, Luiz P.P. Silva, Gelson Medeiros, Adilson B. Ramos, Marcilene B. Ramos, Carlos A.A. Júnior, Paulo G. Barbosa, Sérgio F. Fragoso, Adilson R. Silva, Cecília Cronemberger, Marcelo Rheingantz, Leonardo Nascimento and João Marins for the field support; *Grupo Técnico de Vigilância de Arboviroses* (GT-Arbo – Brazilian Ministry of Health) for field and

743 material supports; and Cassio Leonel Peterka from The Brazilian Ministry of Health for  
744 malaria epidemiological data. The following reagent was obtained through BEI Resources,  
745 NIAID, NIH: *Plasmodium simium*, Strain Howler, MRA-353, contributed by William E.  
746 Collins. The work was supported by the King Abdullah University of Science and  
747 Technology (KAUST) through the baseline fund BRF1020/01/01 to AP and BAS/1/1056-01-  
748 01 to STA, and the Award No. URF/1/1976-25 from the Office of Sponsored Research  
749 (OSR). The field work in the Atlantic Forest and laboratory analysis in Brazil received  
750 financial support from the Secretary for Health Surveillance of the Ministry of Health through  
751 the Global Fund (agreement IOC-005-Fio-13), *Programa Nacional de Excelência (PRONEX)*  
752 and contract 407873/2018-0 of the *Conselho Nacional de Desenvolvimento Científico e*  
753 *Tecnológico (CNPq)*, the *Fundação de Amparo à Pesquisa do Estado de Minas Gerais*  
754 *(Fapemig CBB-APQ-02620-15)* and the *Fundação Carlos Chagas Filho de Amparo à*  
755 *Pesquisa do Estado do Rio de Janeiro (Faperj)*, Brazil. CNPq supports CFAB, CTDR,  
756 MFFC, PB and RLO, with a research productivity fellowship. CTDR (CNE: E-  
757 26/202.921/2018), MFFC, PB and RLO are also supported by Faperj as *Cientistas do nosso*  
758 *estado*. AdP-C was supported by a postdoctoral fellowship from the Faperj and DAMA by a  
759 fellowship from the CGZV-SVS (Brazilian Ministry of Health) TED 49/2018 grant. SF was  
760 supported by a Wellcome Seed Award in Science to DCJ (208965/Z/17/Z).

762

763

#### **Author contributions**

764

765

766

767

768

769

770

771

772

773

774

#### **References**

775

- 776 1 Brasil, P. *et al.* Outbreak of human malaria caused by *Plasmodium simium* in the Atlantic  
777 Forest in Rio de Janeiro: a molecular epidemiological investigation. *Lancet Glob Health* **5**,  
778 e1038-e1046, doi:10.1016/S2214-109X(17)30333-9 (2017).
- 779 2 Cox-Singh, J. *et al.* *Plasmodium knowlesi* malaria in humans is widely distributed and  
780 potentially life threatening. *Clinical infectious diseases : an official publication of the*  
781 *Infectious Diseases Society of America* **46**, 165-171, doi:10.1086/524888 (2008).
- 782 3 Imwong, M. *et al.* Asymptomatic Natural Human Infections With the Simian Malaria  
783 Parasites *Plasmodium cynomolgi* and *Plasmodium knowlesi*. *J Infect Dis* **219**, 695-702,  
784 doi:10.1093/infdis/jiy519 (2019).
- 785 4 Loy, D. E. *et al.* Out of Africa: origins and evolution of the human malaria parasites  
786 *Plasmodium falciparum* and *Plasmodium vivax*. *Int J Parasitol* **47**, 87-97,  
787 doi:10.1016/j.ijpara.2016.05.008 (2017).
- 788 5 Liu, W. *et al.* Origin of the human malaria parasite *Plasmodium falciparum* in gorillas. *Nature*  
789 **467**, 420-425, doi:10.1038/nature09442 (2010).
- 790 6 Liu, W. *et al.* African origin of the malaria parasite *Plasmodium vivax*. *Nature*  
791 *communications* **5**, 3346, doi:10.1038/ncomms4346 (2014).
- 792 7 Marques, G. R., Condino, M. L., Serpa, L. L. & Cursino, T. V. [Epidemiological aspects of  
793 autochthonous malaria in the Atlantic forest area of the northern coast of the State of Sao  
794 Paulo, 1985-2006]. *Rev Soc Bras Med Trop* **41**, 386-389 (2008).
- 795 8 Cox-Singh, J. *et al.* *Plasmodium knowlesi* malaria in humans is widely distributed and  
796 potentially life threatening. *Clin Infect Dis* **46**, 165-171, doi:10.1086/524888 (2008).
- 797 9 Ta, T. H. *et al.* First case of a naturally acquired human infection with *Plasmodium*  
798 *cynomolgi*. *Malar J* **13**, 68, doi:10.1186/1475-2875-13-68 (2014).
- 799 10 Marchand, R. P., Culleton, R., Maeno, Y., Quang, N. T. & Nakazawa, S. Co-infections of  
800 *Plasmodium knowlesi*, *P. falciparum*, and *P. vivax* among Humans and *Anopheles dirus*  
801 Mosquitoes, Southern Vietnam. *Emerg Infect Dis* **17**, 1232-1239, doi:10.3201/eid1707.101551  
802 (2011).
- 803 11 Otto, T. D. *et al.* Genomes of all known members of a *Plasmodium* subgenus reveal paths to  
804 virulent human malaria. *Nature microbiology* **3**, 687-697, doi:10.1038/s41564-018-0162-2  
805 (2018).



- 806 12 de Pina-Costa, A. *et al.* Malaria in Brazil: what happens outside the Amazonian endemic  
807 region. *Mem Inst Oswaldo Cruz* **109**, 618-633, doi:10.1590/0074-0276140228 (2014).
- 808 13 Collins, W. E., Contacos, P. G. & Guinn, E. G. Observations on the sporogonic cycle and  
809 transmission of *Plasmodium simium* Da Fonseca. *J Parasitol* **55**, 814-816 (1969).
- 810 14 de Alvarenga, D. A. M. *et al.* An assay for the identification of *Plasmodium simium* infection  
811 for diagnosis of zoonotic malaria in the Brazilian Atlantic Forest. *Scientific reports* **8**, 86,  
812 doi:10.1038/s41598-017-18216-x (2018).
- 813 15 Escalante, A. A. *et al.* A monkey's tale: the origin of *Plasmodium vivax* as a human malaria  
814 parasite. *Proc Natl Acad Sci U S A* **102**, 1980-1985, doi:10.1073/pnas.0409652102 (2005).
- 815 16 Gelabert, P. *et al.* Mitochondrial DNA from the eradicated European *Plasmodium vivax* and *P.*  
816 *falciparum* from 70-year-old slides from the Ebro Delta in Spain. *Proceedings of the National*  
817 *Academy of Sciences of the United States of America* **113**, 11495-11500,  
818 doi:10.1073/pnas.1611017113 (2016).
- 819 17 Rodrigues, P. T. *et al.* Human migration and the spread of malaria parasites to the New World.  
820 *Scientific reports* **8**, 1993, doi:10.1038/s41598-018-19554-0 (2018).
- 821 18 Deane, L. M. Simian malaria in Brazil. *Mem Inst Oswaldo Cruz* **87 Suppl 3**, 1-20 (1992).
- 822 19 Fonseca, F. [*Plasmodium* of a primate of Brazil]. *Mem Inst Oswaldo Cruz* **49**, 543-553 (1951).
- 823 20 Leclerc, M. C. *et al.* Meager genetic variability of the human malaria agent *Plasmodium*  
824 *vivax*. *Proceedings of the National Academy of Sciences of the United States of America* **101**,  
825 14455-14460, doi:10.1073/pnas.0405186101 (2004).
- 826 21 Duarte, A. M. *et al.* Widespread occurrence of antibodies against circumsporozoite protein  
827 and against blood forms of *Plasmodium vivax*, *P. falciparum* and *P. malariae* in Brazilian wild  
828 monkeys. *J Med Primatol* **35**, 87-96, doi:10.1111/j.1600-0684.2006.00148.x (2006).
- 829 22 Tazi, L. & Ayala, F. J. Unresolved direction of host transfer of *Plasmodium vivax* v. *P.*  
830 *simium* and *P. malariae* v. *P. brasilianum*. *Infect Genet Evol* **11**, 209-221,  
831 doi:10.1016/j.meegid.2010.08.007 (2011).
- 832 23 Coatney, G. R., Collins, W. E., Warren, M. & Contacos, P. G. in *The Primate Malariae*  
833 (National Institutes of Health, 1971).

- 834 24 Auburn, S. *et al.* A new *Plasmodium vivax* reference sequence with improved assembly of the  
835 subtelomeres reveals an abundance of *pir* genes. *Wellcome Open Res* **1**, 4,  
836 doi:10.12688/wellcomeopenres.9876.1 (2016).
- 837 25 Hupalo, D. N. *et al.* Population genomics studies identify signatures of global dispersal and  
838 drug resistance in *Plasmodium vivax*. *Nat Genet* **48**, 953-958, doi:10.1038/ng.3588 (2016).
- 839 26 Alexander, D. H., Novembre, J. & Lange, K. Fast model-based estimation of ancestry in  
840 unrelated individuals. *Genome research* **19**, 1655-1664, doi:10.1101/gr.094052.109 (2009).
- 841 27 Willing, E. M., Dreyer, C. & van Oosterhout, C. Estimates of genetic differentiation measured  
842 by F(ST) do not necessarily require large sample sizes when using many SNP markers. *PloS*  
843 *one* **7**, e42649, doi:10.1371/journal.pone.0042649 (2012).
- 844 28 Cunningham, D., Lawton, J., Jarra, W., Preiser, P. & Langhorne, J. The *pir* multigene family  
845 of *Plasmodium*: antigenic variation and beyond. *Mol Biochem Parasitol* **170**, 65-73,  
846 doi:10.1016/j.molbiopara.2009.12.010 (2010).
- 847 29 Warncke, J. D., Vakonakis, I. & Beck, H. P. *Plasmodium* Helical Interspersed Subtelomeric  
848 (PHIST) Proteins, at the Center of Host Cell Remodeling. *Microbiol Mol Biol Rev* **80**, 905-  
849 927, doi:10.1128/MMBR.00014-16 (2016).
- 850 30 Castillo, A. I., Andreina Pacheco, M. & Escalante, A. A. Evolution of the merozoite surface  
851 protein 7 (*msp7*) family in *Plasmodium vivax* and *P. falciparum*: A comparative approach.  
852 *Infect Genet Evol* **50**, 7-19, doi:10.1016/j.meegid.2017.01.024 (2017).
- 853 31 Ntumngia, F. B. *et al.* Characterisation of a tryptophan-rich *Plasmodium falciparum* antigen  
854 associated with merozoites. *Mol Biochem Parasitol* **137**, 349-353,  
855 doi:10.1016/j.molbiopara.2004.06.008 (2004).
- 856 32 Kanjee, U., Rangel, G. W., Clark, M. A. & Duraisingh, M. T. Molecular and cellular  
857 interactions defining the tropism of *Plasmodium vivax* for reticulocytes. *Curr Opin Microbiol*  
858 **46**, 109-115, doi:10.1016/j.mib.2018.10.002 (2018).
- 859 33 Miller, L. H., McAuliffe, F. M. & Mason, S. J. Erythrocyte receptors for malaria merozoites.  
860 *Am J Trop Med Hyg* **26**, 204-208, doi:10.4269/ajtmh.1977.26.204 (1977).
- 861 34 Iyer, J., Gruner, A. C., Renia, L., Snounou, G. & Preiser, P. R. Invasion of host cells by  
862 malaria parasites: a tale of two protein families. *Mol Microbiol* **65**, 231-249,  
863 doi:10.1111/j.1365-2958.2007.05791.x (2007).

- 864 35 Chan, L. J., Dietrich, M. H., Nguitragool, W. & Tham, W. H. Plasmodium vivax Reticulocyte  
865 Binding Proteins for invasion into reticulocytes. *Cell Microbiol*, e13110,  
866 doi:10.1111/cmi.13110 (2019).
- 867 36 Gruszczyk, J. *et al.* Cryo-EM structure of an essential Plasmodium vivax invasion complex.  
868 *Nature* **559**, 135-139, doi:10.1038/s41586-018-0249-1 (2018).
- 869 37 Carlton, J. M. *et al.* Comparative genomics of the neglected human malaria parasite  
870 Plasmodium vivax. *Nature* **455**, 757-763, doi:10.1038/nature07327 (2008).
- 871 38 Gilabert, A. *et al.* Plasmodium vivax-like genome sequences shed new insights into  
872 Plasmodium vivax biology and evolution. *PLoS Biol* **16**, e2006035,  
873 doi:10.1371/journal.pbio.2006035 (2018).
- 874 39 Ntumngia, F. B. *et al.* Genetic variation among Plasmodium vivax isolates adapted to non-  
875 human primates and the implication for vaccine development. *Am J Trop Med Hyg* **80**, 218-  
876 227 (2009).
- 877 40 Rausch, T. *et al.* DELLY: structural variant discovery by integrated paired-end and split-read  
878 analysis. *Bioinformatics* **28**, i333-i339, doi:10.1093/bioinformatics/bts378 (2012).
- 879 41 Batchelor, J. D., Zahm, J. A. & Tolia, N. H. Dimerization of Plasmodium vivax DBP is  
880 induced upon receptor binding and drives recognition of DARC. *Nat Struct Mol Biol* **18**, 908-  
881 914, doi:10.1038/nsmb.2088 (2011).
- 882 42 Jeffares, D. C., Tomiczek, B., Sojo, V. & dos Reis, M. A beginners guide to estimating the  
883 non-synonymous to synonymous rate ratio of all protein-coding genes in a genome. *Methods*  
884 *Mol Biol* **1201**, 65-90, doi:10.1007/978-1-4939-1438-8\_4 (2015).
- 885 43 Proto, W. R. *et al.* Adaptation of Plasmodium falciparum to humans involved the loss of an  
886 ape-specific erythrocyte invasion ligand. *Nature communications* **10**, 4512,  
887 doi:10.1038/s41467-019-12294-3 (2019).
- 888 44 Wright, P. E. & Dyson, H. J. Intrinsically disordered proteins in cellular signalling and  
889 regulation. *Nature reviews. Molecular cell biology* **16**, 18-29, doi:10.1038/nrm3920 (2015).
- 890 45 Culleton, R. & Carter, R. African Plasmodium vivax: distribution and origins. *Int J Parasitol*  
891 **42**, 1091-1097, doi:10.1016/j.ijpara.2012.08.005 (2012).
- 892 46 Li, J. *et al.* Geographic subdivision of the range of the malaria parasite Plasmodium vivax.  
893 *Emerging infectious diseases* **7**, 35-42, doi:10.3201/eid0701.010105 (2001).

- 894 47 Choi, E. H., Lee, S. K., Ihm, C. & Sohn, Y. H. Rapid DNA extraction from dried blood spots  
895 on filter paper: potential applications in biobanking. *Osong Public Health Res Perspect* **5**,  
896 351-357, doi:10.1016/j.phrp.2014.09.005 (2014).
- 897 48 Bolger, A. M., Lohse, M. & Usadel, B. Trimmomatic: a flexible trimmer for Illumina  
898 sequence data. *Bioinformatics* **30**, 2114-2120, doi:10.1093/bioinformatics/btu170 (2014).
- 899 49 Langmead, B. & Salzberg, S. L. Fast gapped-read alignment with Bowtie 2. *Nature methods*  
900 **9**, 357-359, doi:10.1038/nmeth.1923 (2012).
- 901 50 Bankevich, A. *et al.* SPAdes: a new genome assembly algorithm and its applications to single-  
902 cell sequencing. *J Comput Biol* **19**, 455-477, doi:10.1089/cmb.2012.0021 (2012).
- 903 51 Boetzer, M., Henkel, C. V., Jansen, H. J., Butler, D. & Pirovano, W. Scaffolding pre-  
904 assembled contigs using SSPACE. *Bioinformatics* **27**, 578-579,  
905 doi:10.1093/bioinformatics/btq683 (2011).
- 906 52 Boetzer, M. & Pirovano, W. Toward almost closed genomes with GapFiller. *Genome biology*  
907 **13**, R56, doi:10.1186/gb-2012-13-6-r56 (2012).
- 908 53 Walker, B. J. *et al.* Pilon: an integrated tool for comprehensive microbial variant detection and  
909 genome assembly improvement. *PloS one* **9**, e112963, doi:10.1371/journal.pone.0112963  
910 (2014).
- 911 54 Laetsch, D. & Blaxter, M. BlobTools: Interrogation of genome assemblies [version 1;  
912 referees: 2 approved with reservations]. *F1000Research* **6**,  
913 doi:10.12688/f1000research.12232.1 (2017).
- 914 55 Jongwutiwes, S. *et al.* Mitochondrial genome sequences support ancient population expansion  
915 in Plasmodium vivax. *Molecular biology and evolution* **22**, 1733-1739,  
916 doi:10.1093/molbev/msi168 (2005).
- 917 56 Rodrigues, P. T. *et al.* Using mitochondrial genome sequences to track the origin of imported  
918 Plasmodium vivax infections diagnosed in the United States. *Am J Trop Med Hyg* **90**, 1102-  
919 1108, doi:10.4269/ajtmh.13-0588 (2014).
- 920 57 Bandelt, H. J., Forster, P. & Rohl, A. Median-joining networks for inferring intraspecific  
921 phylogenies. *Molecular biology and evolution* **16**, 37-48,  
922 doi:10.1093/oxfordjournals.molbev.a026036 (1999).

- 923 58 Leigh, J. W. & Bryant, D. POPART: full-feature software for haplotype network construction.  
924 *Methods Ecol Evol* **6**, 1110-1116, doi:10.1111/2041-210x.12410 (2015).
- 925 59 Holt, C. & Yandell, M. MAKER2: an annotation pipeline and genome-database management  
926 tool for second-generation genome projects. *BMC Bioinformatics* **12**, 491, doi:10.1186/1471-  
927 2105-12-491 (2011).
- 928 60 Steinbiss, S. *et al.* Companion: a web server for annotation and analysis of parasite genomes.  
929 *Nucleic acids research* **44**, W29-34, doi:10.1093/nar/gkw292 (2016).
- 930 61 Waterhouse, R. M. *et al.* BUSCO applications from quality assessments to gene prediction  
931 and phylogenomics. *Molecular biology and evolution*, doi:10.1093/molbev/msx319 (2017).
- 932 62 Simao, F. A., Waterhouse, R. M., Ioannidis, P., Kriventseva, E. V. & Zdobnov, E. M.  
933 BUSCO: assessing genome assembly and annotation completeness with single-copy  
934 orthologs. *Bioinformatics* **31**, 3210-3212, doi:10.1093/bioinformatics/btv351 (2015).
- 935 63 Lechner, M. *et al.* Proteinortho: detection of (co-)orthologs in large-scale analysis. *BMC*  
936 *Bioinformatics* **12**, 124, doi:10.1186/1471-2105-12-124 (2011).
- 937 64 Katoh, K. & Standley, D. M. MAFFT multiple sequence alignment software version 7:  
938 improvements in performance and usability. *Molecular biology and evolution* **30**, 772-780,  
939 doi:10.1093/molbev/mst010 (2013).
- 940 65 Capella-Gutierrez, S., Silla-Martinez, J. M. & Gabaldon, T. trimAl: a tool for automated  
941 alignment trimming in large-scale phylogenetic analyses. *Bioinformatics* **25**, 1972-1973,  
942 doi:10.1093/bioinformatics/btp348 (2009).
- 943 66 Stamatakis, A. RAxML version 8: a tool for phylogenetic analysis and post-analysis of large  
944 phylogenies. *Bioinformatics* **30**, 1312-1313, doi:10.1093/bioinformatics/btu033 (2014).
- 945 67 Sedlazeck, F. J., Rescheneder, P. & von Haeseler, A. NextGenMap: fast and accurate read  
946 mapping in highly polymorphic genomes. *Bioinformatics* **29**, 2790-2791,  
947 doi:10.1093/bioinformatics/btt468 (2013).
- 948 68 Li, H. *et al.* The Sequence Alignment/Map format and SAMtools. *Bioinformatics* **25**, 2078-  
949 2079, doi:btp352 [pii]  
950 10.1093/bioinformatics/btp352 (2009).

- 951 69 McKenna, A. *et al.* The Genome Analysis Toolkit: a MapReduce framework for analyzing  
952 next-generation DNA sequencing data. *Genome research* **20**, 1297-1303,  
953 doi:10.1101/gr.107524.110 (2010).
- 954 70 Garrison, E. & Marth, G. Haplotype-based variant detection from short-read sequencing.  
955 *arXiv*, 1207.3907 (2012).
- 956 71 Chang, C. C. *et al.* Second-generation PLINK: rising to the challenge of larger and richer  
957 datasets. *Gigascience* **4**, 7, doi:10.1186/s13742-015-0047-8 (2015).
- 958 72 Pfeifer, B., Wittelsburger, U., Ramos-Onsins, S. E. & Lercher, M. J. PopGenome: an efficient  
959 Swiss army knife for population genomic analyses in R. *Molecular biology and evolution* **31**,  
960 1929-1936, doi:10.1093/molbev/msu136 (2014).
- 961 73 R Development Core Team. R: A language and environment for statistical computing. R  
962 Foundation for Statistical Computing, Vienna, Austria. ISBN 3-900051-07-0, URL  
963 <http://www.R-project.org>. (2007).
- 964 74 Weir, B. S. & Cockerham, C. C. Estimating F-Statistics for the Analysis of Population  
965 Structure. *Evolution* **38**, 1358-1370, doi:10.1111/j.1558-5646.1984.tb05657.x (1984).
- 966 75 Cingolani, P. *et al.* A program for annotating and predicting the effects of single nucleotide  
967 polymorphisms, SnpEff: SNPs in the genome of *Drosophila melanogaster* strain w1118; iso-2;  
968 iso-3. *Fly (Austin)* **6**, 80-92, doi:10.4161/fly.19695 (2012).
- 969 76 Guindon, S. *et al.* New algorithms and methods to estimate maximum-likelihood phylogenies:  
970 assessing the performance of PhyML 3.0. *Syst Biol* **59**, 307-321, doi:10.1093/sysbio/syq010  
971 (2010).
- 972 77 Guindon, S. & Gascuel, O. A simple, fast, and accurate algorithm to estimate large  
973 phylogenies by maximum likelihood. *Syst Biol* **52**, 696-704, doi:10.1080/10635150390235520  
974 (2003).
- 975 78 Lefort, V., Longueville, J. E. & Gascuel, O. SMS: Smart Model Selection in PhyML.  
976 *Molecular biology and evolution* **34**, 2422-2424, doi:10.1093/molbev/msx149 (2017).
- 977 79 Anisimova, M., Gil, M., Dufayard, J. F., Dessimoz, C. & Gascuel, O. Survey of branch  
978 support methods demonstrates accuracy, power, and robustness of fast likelihood-based  
979 approximation schemes. *Syst Biol* **60**, 685-699, doi:10.1093/sysbio/syr041 (2011).

- 980 80 Huson, D. H. & Bryant, D. Application of phylogenetic networks in evolutionary studies.  
981 *Molecular biology and evolution* **23**, 254-267, doi:10.1093/molbev/msj030 (2006).
- 982 81 Bryant, D. & Moulton, V. Neighbor-net: an agglomerative method for the construction of  
983 phylogenetic networks. *Molecular biology and evolution* **21**, 255-265,  
984 doi:10.1093/molbev/msh018 (2004).
- 985 82 Larkin, M. A. *et al.* Clustal W and Clustal X version 2.0. *Bioinformatics* **23**, 2947-2948,  
986 doi:10.1093/bioinformatics/btm404 (2007).
- 987 83 Thompson, J. D., Higgins, D. G. & Gibson, T. J. CLUSTAL W: improving the sensitivity of  
988 progressive multiple sequence alignment through sequence weighting, position-specific gap  
989 penalties and weight matrix choice. *Nucleic acids research* **22**, 4673-4680 (1994).
- 990 84 Chaisson, M. J. & Tesler, G. Mapping single molecule sequencing reads using basic local  
991 alignment with successive refinement (BLASR): application and theory. *BMC Bioinformatics*  
992 **13**, 238, doi:10.1186/1471-2105-13-238 (2012).
- 993 85 Seibt, K. M., Schmidt, T. & Heitkam, T. FlexiDot: highly customizable, ambiguity-aware  
994 dotplots for visual sequence analyses. *Bioinformatics* **34**, 3575-3577,  
995 doi:10.1093/bioinformatics/bty395 (2018).
- 996 86 van Ooij, C. *et al.* The malaria secretome: from algorithms to essential function in blood stage  
997 infection. *PLoS pathogens* **4**, e1000084, doi:10.1371/journal.ppat.1000084 (2008).
- 998 87 Boddey, J. A. *et al.* Role of plasmepsin V in export of diverse protein families from the  
999 *Plasmodium falciparum* exportome. *Traffic* **14**, 532-550, doi:10.1111/tra.12053 (2013).
- 1000 88 Schulze, J. *et al.* The *Plasmodium falciparum* exportome contains non-canonical PEXEL/HT  
1001 proteins. *Mol Microbiol* **97**, 301-314, doi:10.1111/mmi.13024 (2015).
- 1002 89 Hu, G. *et al.* Transcriptional profiling of growth perturbations of the human malaria parasite  
1003 *Plasmodium falciparum*. *Nat Biotechnol* **28**, 91-98, doi:10.1038/nbt.1597 (2010).
- 1004 90 Ye, J. *et al.* Primer-BLAST: a tool to design target-specific primers for polymerase chain  
1005 reaction. *BMC Bioinformatics* **13**, 134, doi:10.1186/1471-2105-13-134 (2012).
- 1006 91 Wang, S., Li, W., Liu, S. & Xu, J. RaptorX-Property: a web server for protein structure  
1007 property prediction. *Nucleic acids research* **44**, W430-435, doi:10.1093/nar/gkw306 (2016).

1008 92 Waterhouse, A. *et al.* SWISS-MODEL: homology modelling of protein structures and  
1009 complexes. *Nucleic acids research* **46**, W296-W303, doi:10.1093/nar/gky427 (2018).  
1010

1011

1012

### 1013 **Figure Legends**

#### 1014 **Figure 1 - SNP phylogeny**

1015 A) Mid-point rooted maximum likelihood tree produced from 143,123 concatenated  
1016 SNP positions with data from at least 55 samples. The tree was produced using  
1017 PhyML with the GTR evolutionary model. Branch support was evaluated with the  
1018 Bayesian-like transformation of approximate likelihood ratio test (aBayes). Genetic  
1019 distance shown below tree. *P. vivax* isolates are denoted as colored circles by their  
1020 country of sample origin. A tree with specific sample IDs is available in Figure S7. B)  
1021 Magnification of the *P. simium* clade (as in panel A). C) Map denoting the geographic  
1022 location of *P. simium* samples.

1023

#### 1024 **Figure 2 - Nucleotide diversity**

1025 Box plot showing the pair-wise nucleotide diversity between human-infecting *P.*  
1026 *simium* samples (left), *P. vivax* samples (middle), and between *P. simium* and *P. vivax*  
1027 samples (right). Diversity is shown for entire genome (left-most plots, blue) and  
1028 exonic regions only (right-most plots, orange). Individual values from pairwise  
1029 comparisons are shown as grey dots, boxes denote 25th and 75th percentiles, and  
1030 whiskers an additional 1.5 interquartile lengths. The observed nucleotide diversity  
1031 between *P. simium* and *P. vivax* samples is significantly higher than between *P. vivax*  
1032 samples (Mann-Whitney U, genome;  $p=8.79 \times 10^{-20}$ , exons;  $p=3.72 \times 10^{-20}$ ).

1033

#### 1034 **Figure 3 - $F_{ST}$ ratios**

1035 A) Gene  $F_{ST}$  values were calculated between simium and American vivax samples (x-  
1036 axis) and American and Asian vivax samples (y-axis). Each dot corresponds to a  
1037 gene, and the distributions of the two  $F_{ST}$  measures are shown as bar charts above  
1038 and to the right of the scatter plot. B) The ratio between  $F_{ST}$  values between i) simium  
1039 and American vivax samples, and ii) American and Asian vivax samples were  
1040 calculated for each gene (top). A pseudo count of one was added to all  $F_{ST}$  values.  
1041 The distributions of log2-ratios are shown as violin plots (bottom) for all genes (grey),



1042 PIR genes (red), PHIST genes (brown), TRAg genes (turquoise), invasion genes  
1043 (yellow), and exported genes (dark blue). Only genes with SNP differences between  
1044 the three populations are included in this analysis.  $F_{ST}$  values and ratios are provided  
1045 in Table S7. P-values from Mann-Whitney U tests for differences in medians between  
1046 PIR, PHIST, TRAg, invasion genes, exported genes, and all remaining genes are  
1047 indicated on plot (e.g. PIR genes are compared to all non-PIR genes).

1048

#### 1049 **Figure 4 - Invasome deletions**

1050 A) Overview of the invasome gene groups, Reticulocyte Binding Proteins (RBPs) and  
1051 Duffy Binding Proteins (DBPs) in *Plasmodium vivax* and *P. simium*. The *P. vivax*  
1052 genome harbours two RBP2d genes, one of which is a pseudogene (Table S9). B)  
1053 Schematic depiction of samples with and without the deletion found in DBP1.  
1054 C) Left: Structural rendering of DBP1, showing known structural domains and motifs.  
1055 The two fragment molecules from the human DARC receptor are shown in grey. The  
1056 3-dimensional structure of the DBL-DARC complex was modeled based on the *P.*  
1057 *vivax* crystallographic model (PDB 4nuv). The region deleted in sequences from  
1058 human-infecting *P. simium*, as compared to *P. vivax* P01, is highlighted in red. Right:  
1059 Details of DBP1 protein alignments. A full alignment is available in Figure S20.

1060 D) Similar to panel C) but for RBP2a. The complex between the reticulocyte binding  
1061 domain and the human receptor was modeled based on the cryoEM structure of the  
1062 complex between the *P. vivax* RBP2b and the human transferrin receptor TfR1 (PDB  
1063 6d05). A full alignment is available in Figure S21.

1064

1065

Figure 1

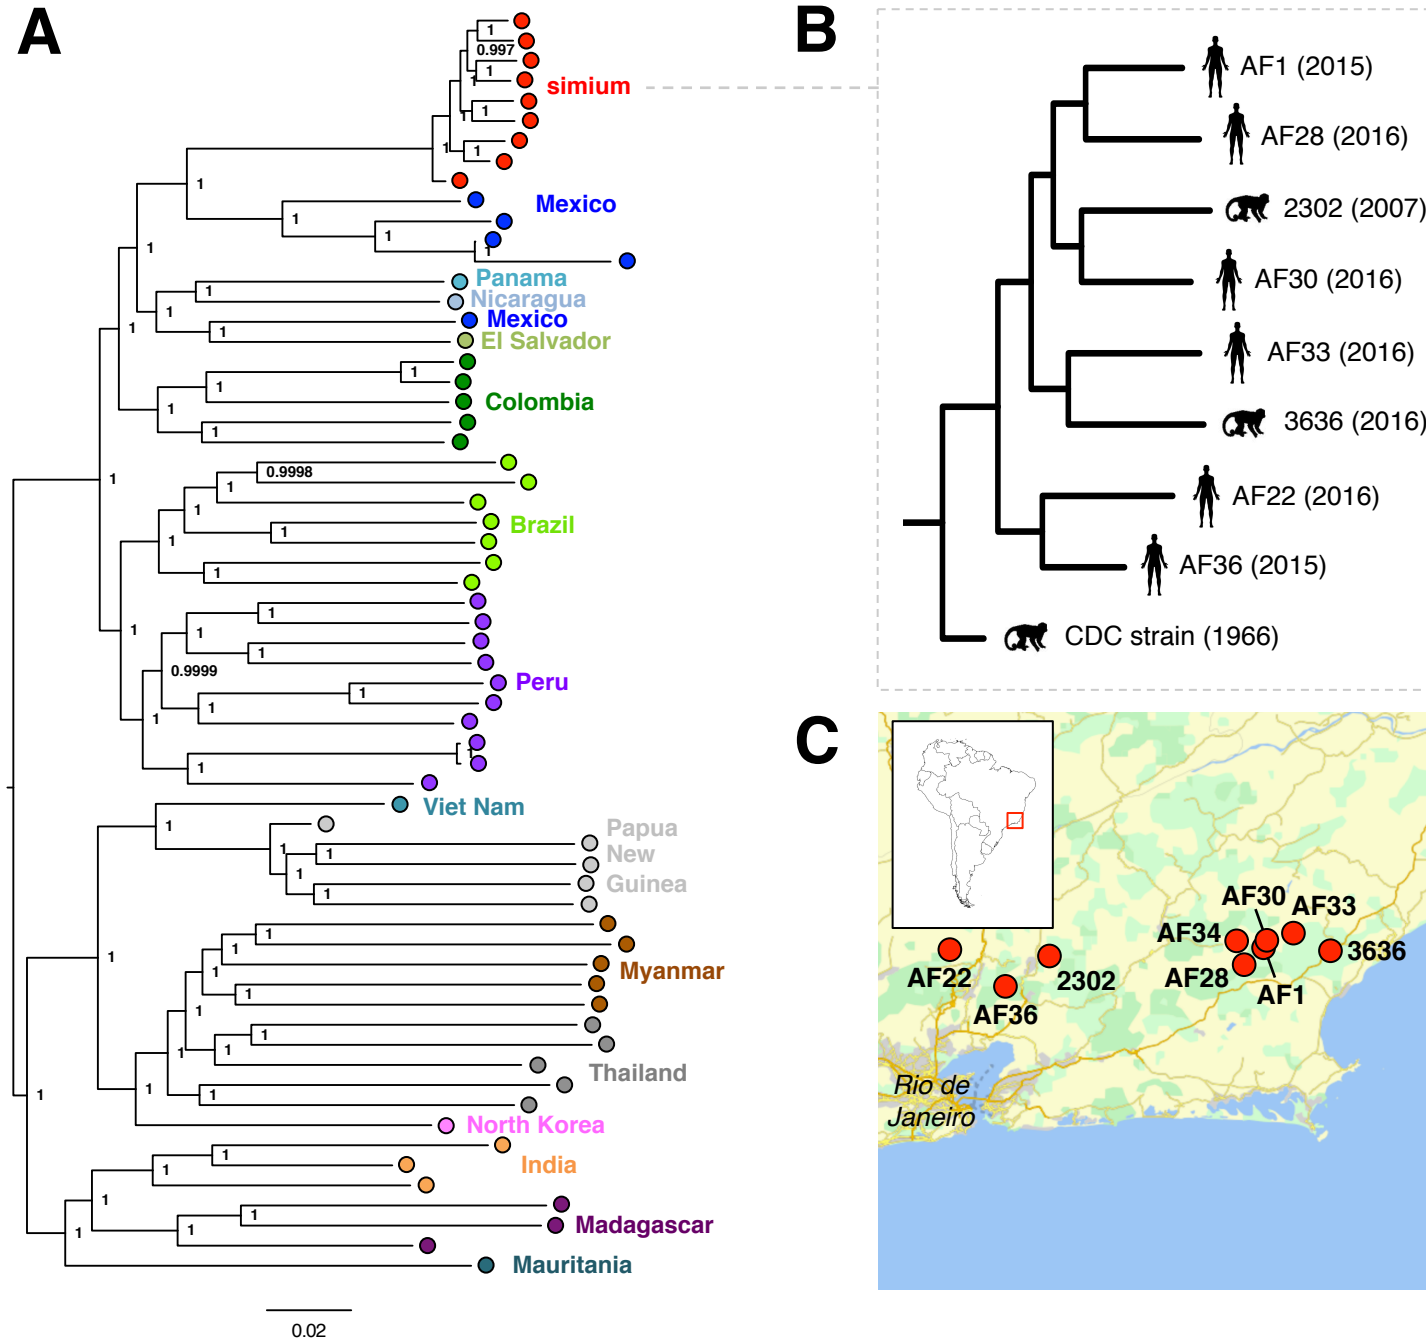

Figure 2

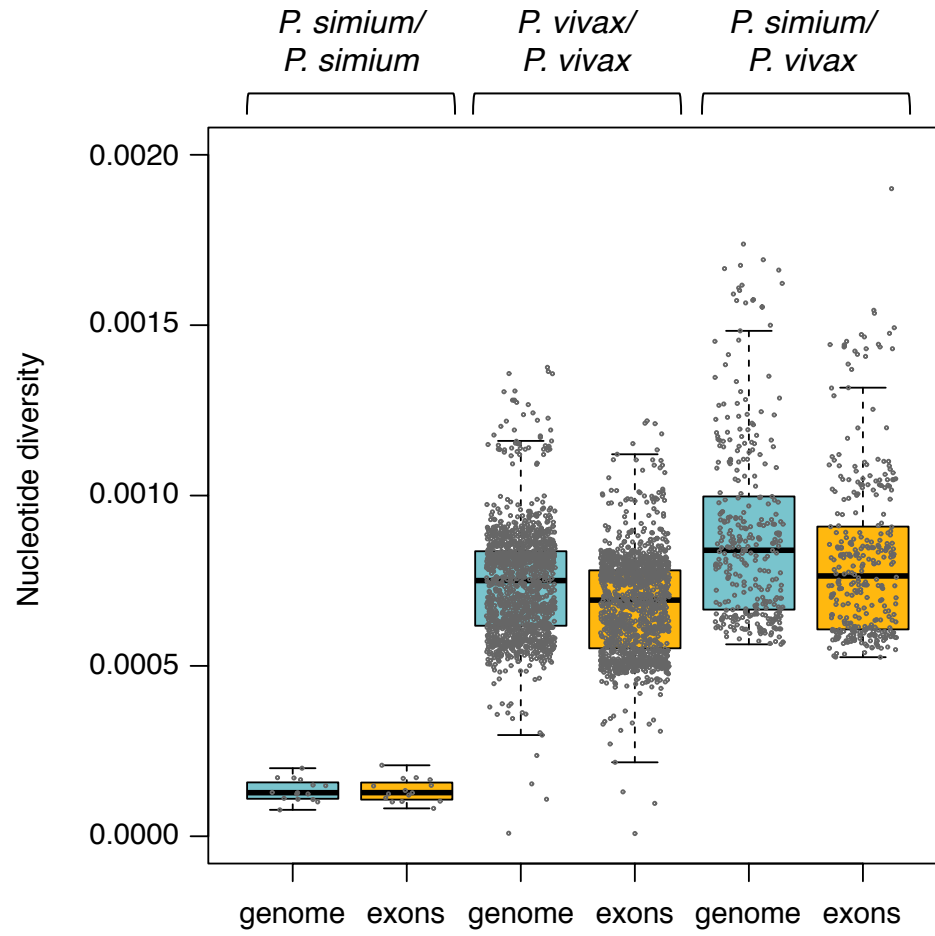

Figure 3

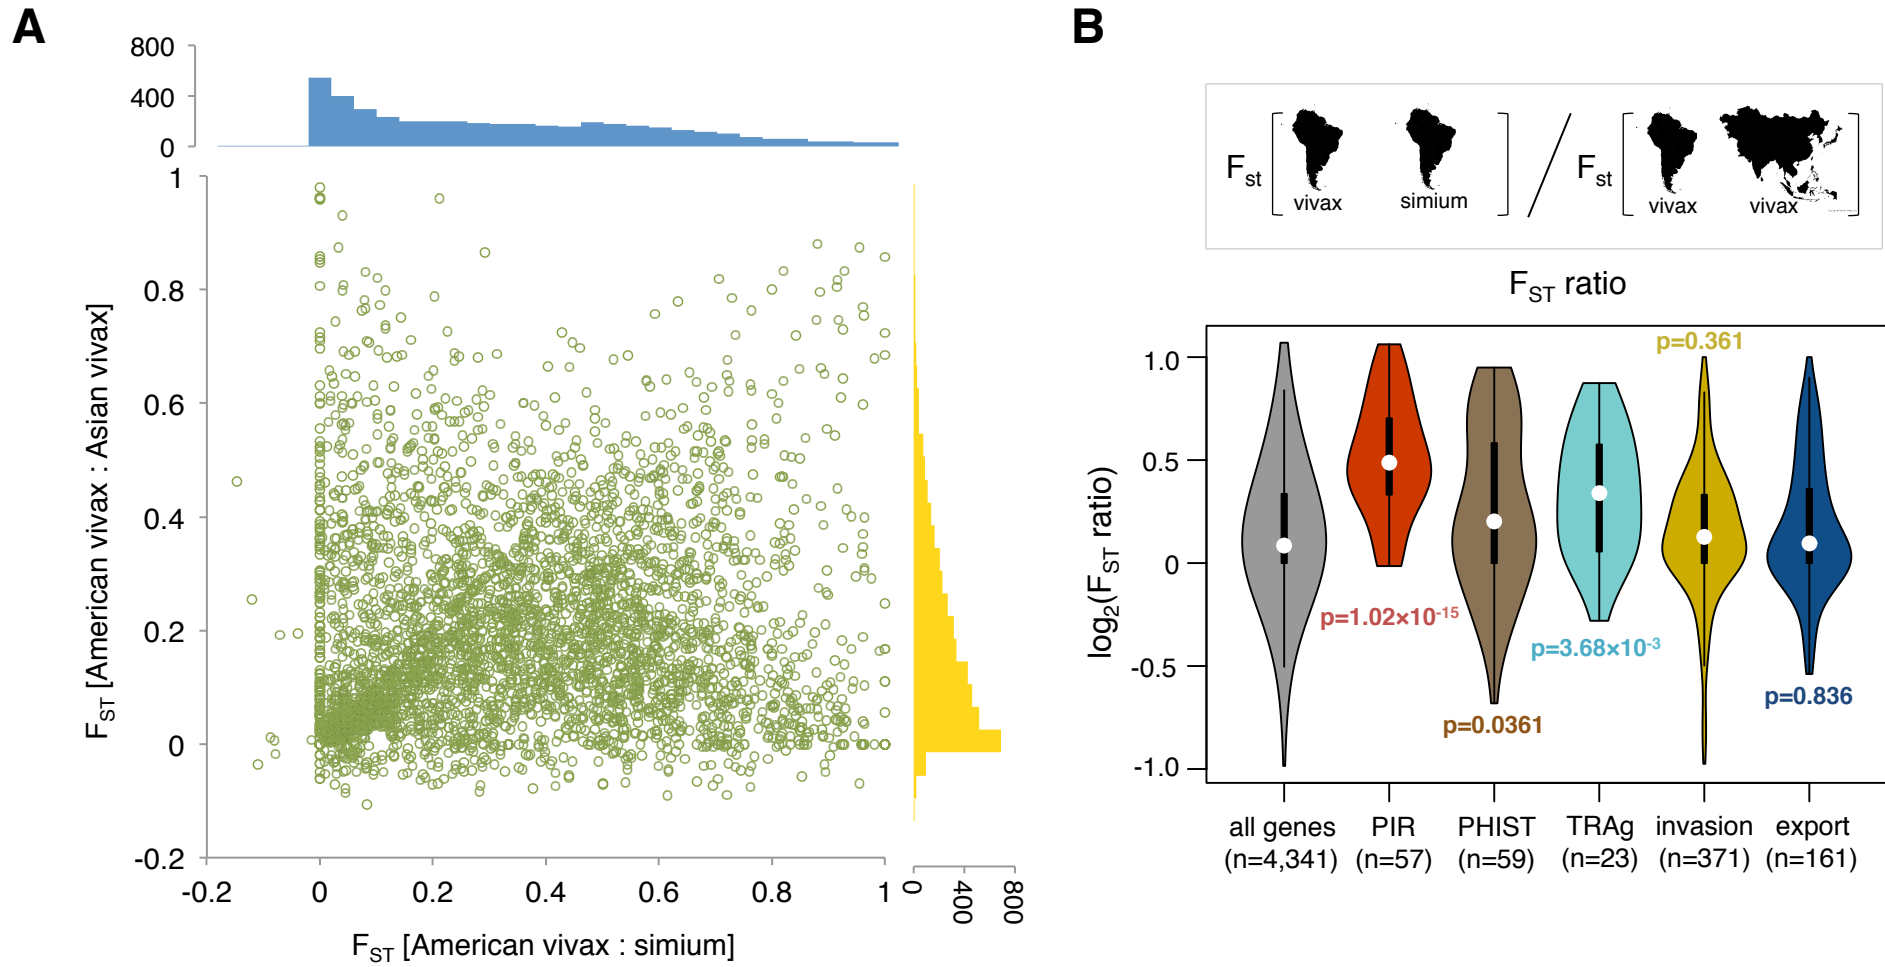

Figure 4

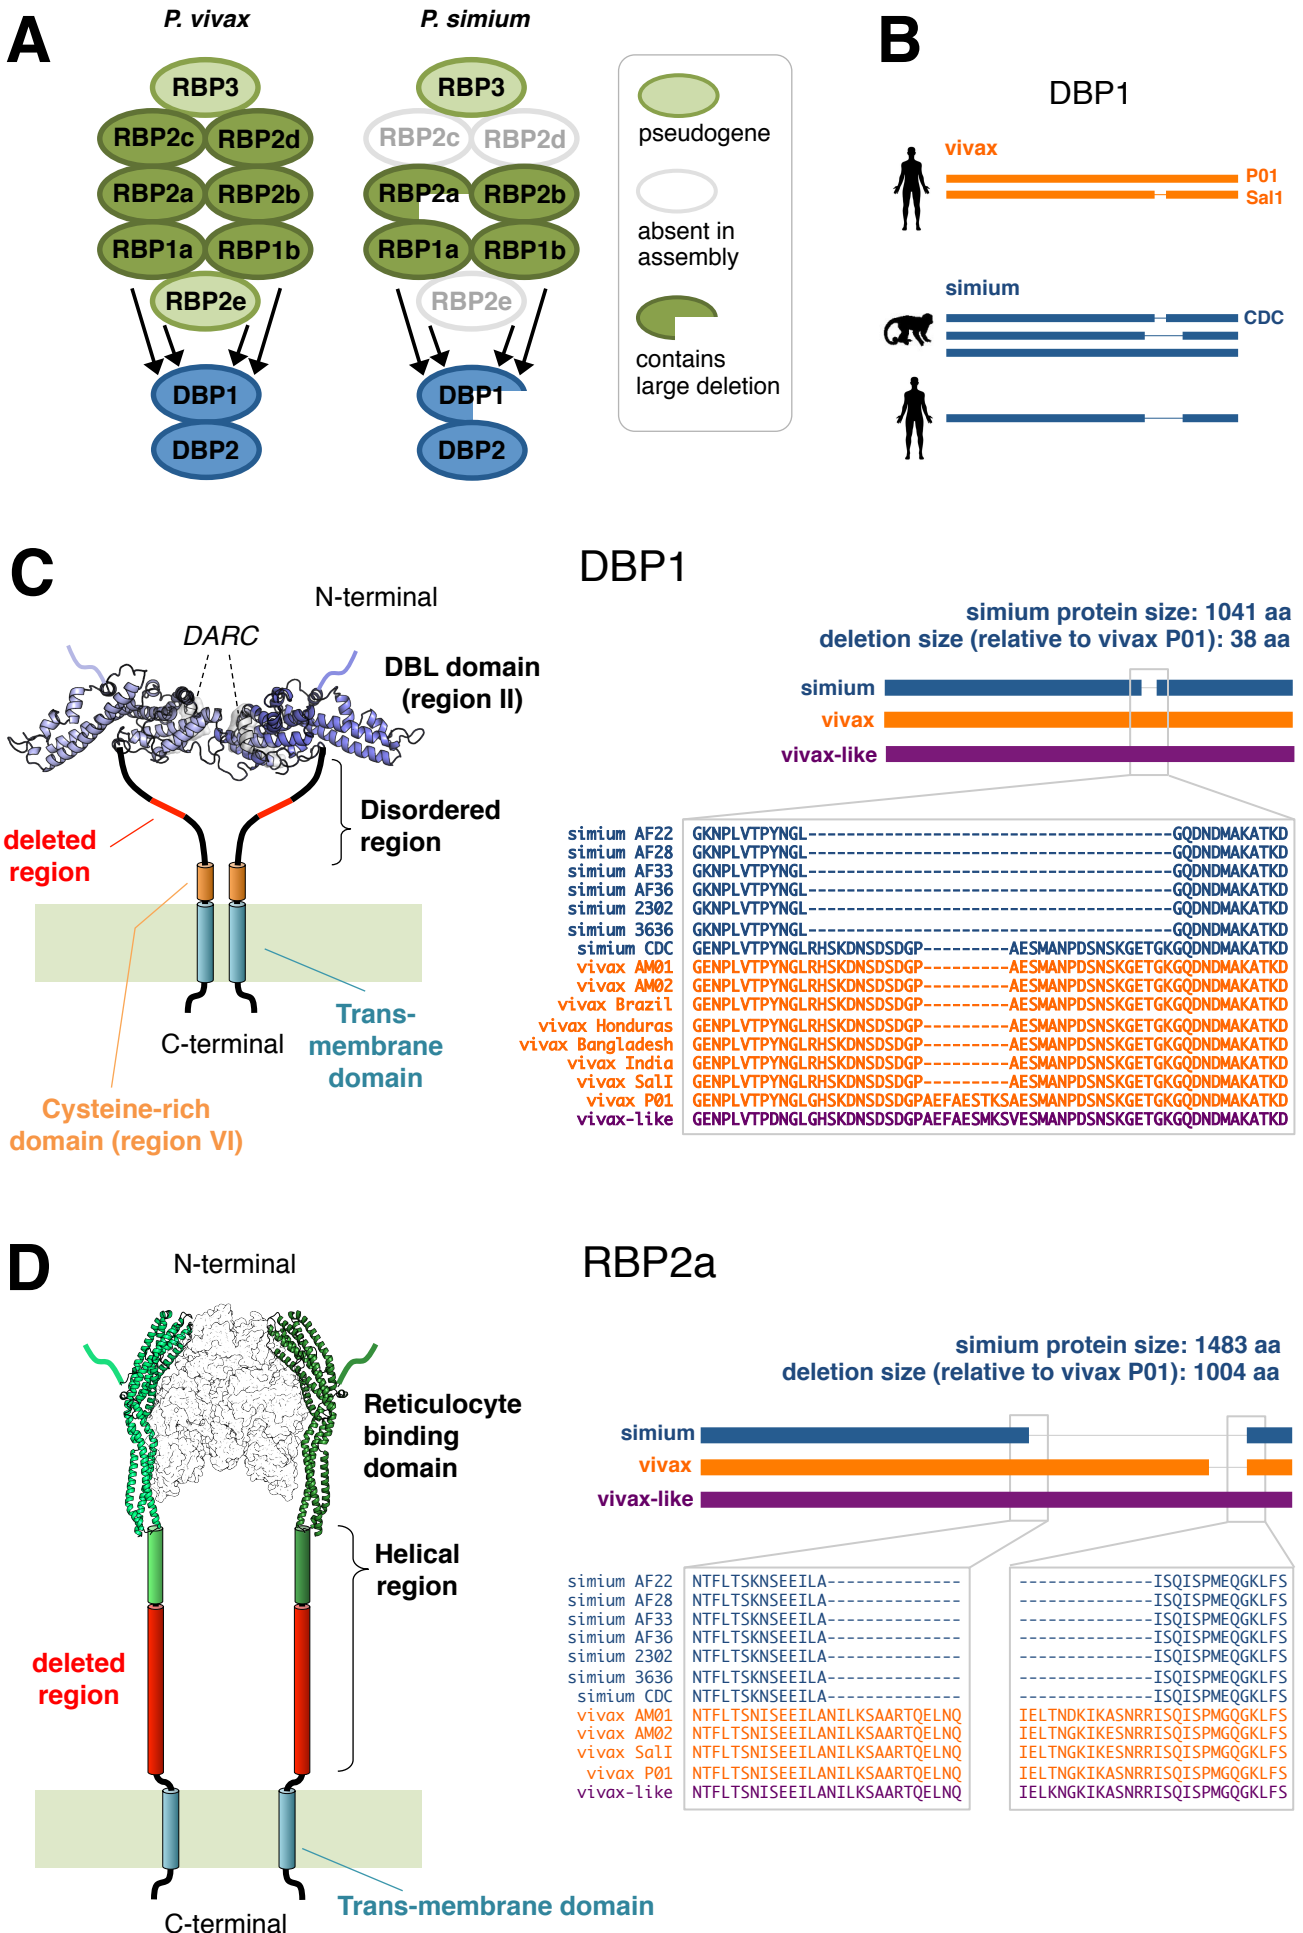

Source: https://www.biorxiv.org/content/10.1101/841171v1.full.pdf
